# Supplementary material for: A cascade reaction for the new and direct synthesis of indolofuroquinoxalines
Source: Royal Society of Chemistry journal article supplement (doi:10.1039/c6ra03556f), 2016-01-01
Supplement: c6ra03556f1.pdf [file c6ra03556f1.pdf]

### Copies of spectra

#### N-substituted- 2-(2-chloro-1H-indol-3-yl)-2-oxoacetate (1a-h)

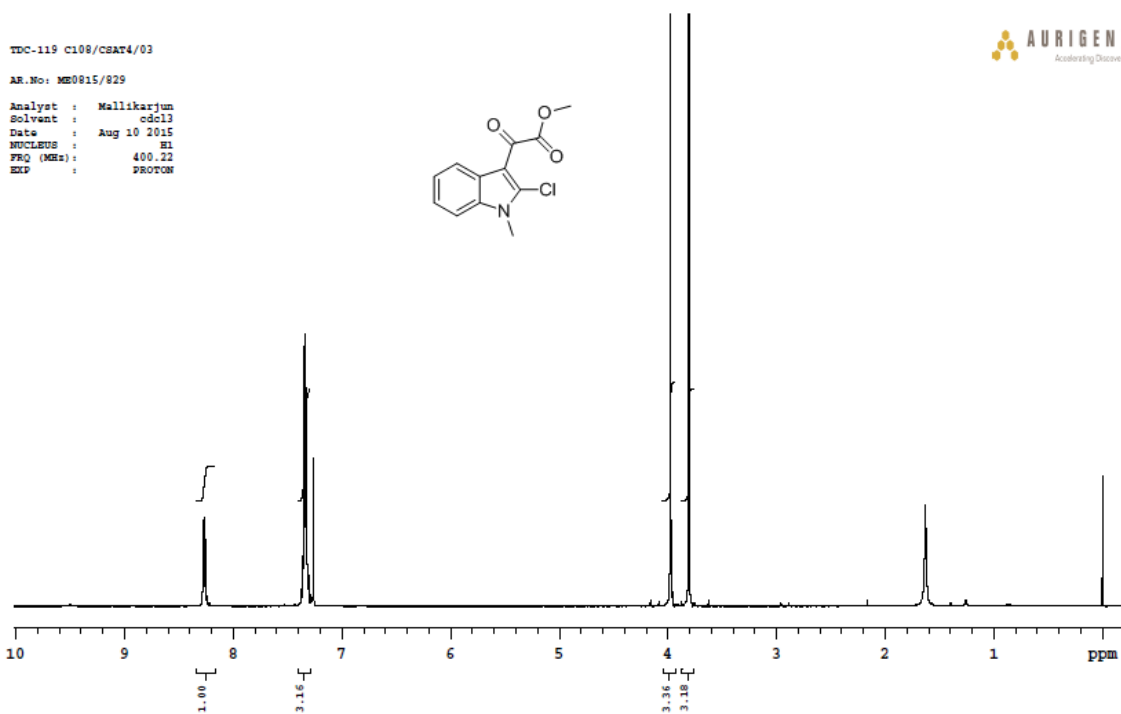

AURIGENE  
Accelerating Discovery

TDC-119 C108/CSAT4/031

AR.No: ME0815/1448

Analyst : Mallikarjun  
Solvent : cdcl3  
Date : Aug 15 2015  
NUCLEUS : C13  
FRQ (MHz): 100.65  
EXP : CARBON

AURIGENE  
Accelerating Discovery

Elemental Composition Report

Single Mass Analysis

Tolerance = 5.0 PPM / DBE: min = -1.5, max = 80.0  
 Element prediction: Off  
 Number of isotope peaks used for i-FIT = 2

Monoisotopic Mass, Even Electron Ions  
 56 formula(e) evaluated with 1 results within limits (up to 20 best isotopic matches for each mass)  
 Elements Used:  
 C: 0-25 H: 0-25 N: 0-2 O: 0-3 Cl: 0-1  
 C108/CSAT4/031  
 150811009 9 (0.178) Cm (9-10)

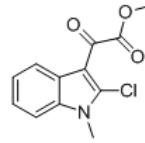

1: TOF MS ES+  
 4.20e+004

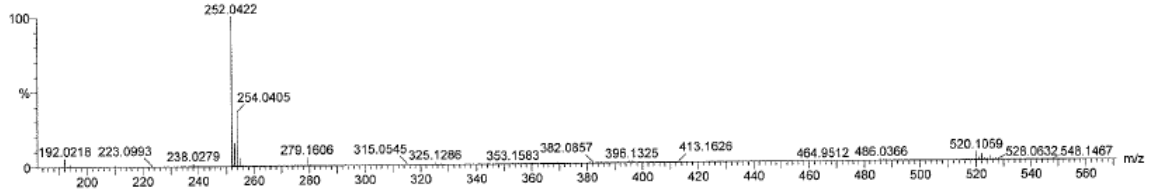

| Mass     | Calc. Mass | mDa  | PPM  | DBE | i-FIT | Formula         |
|----------|------------|------|------|-----|-------|-----------------|
| 252.0422 | 252.0427   | -0.5 | -2.0 | 7.5 | 24.0  | C12 H11 N O3 Cl |

TIC-119 C108/CSAT4/033

AR.No: ME0815/830

Analyst : Mallikarjun  
 Solvent : cdcl3  
 Date : Aug 10 2015  
 NUCLEUS : H1  
 PRQ (MHz): 400.22  
 EXP : PROTON

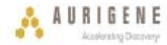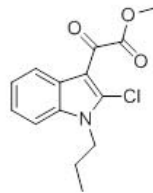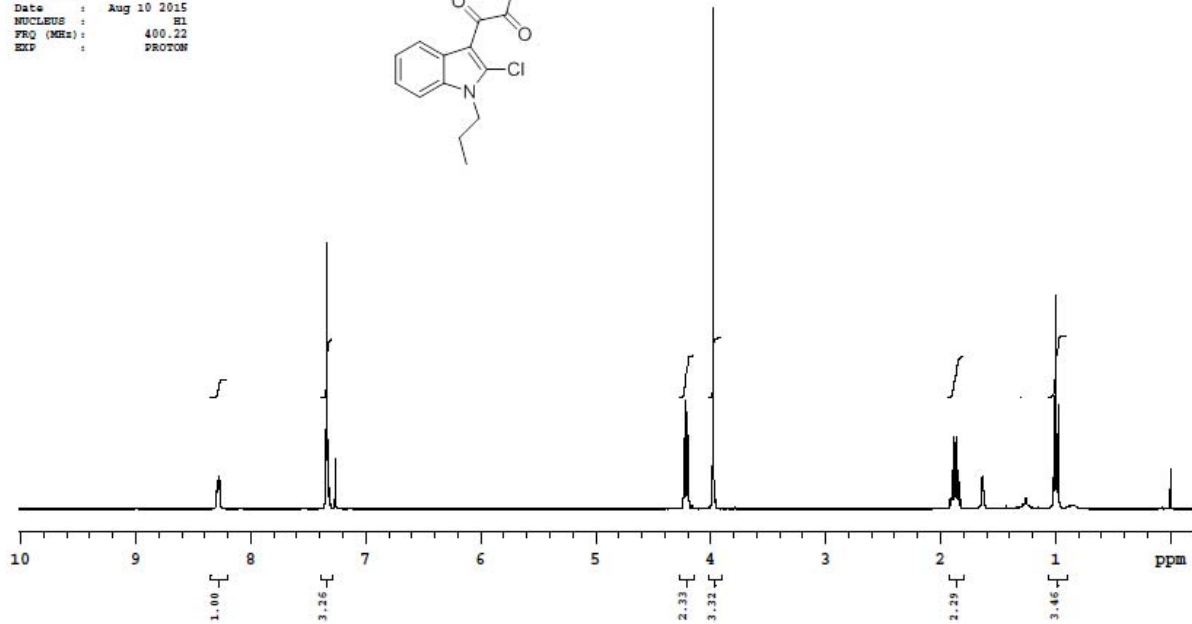

TDC-119 C08/CSAT4/033

AR.No: ME0815/1175

Analyst : Mallikarjun  
Solvent : cdcl3  
Date : Aug 13 2015  
NUCLEUS : C13  
PQ2 (MHz) : 100.62  
EXP : CARBON

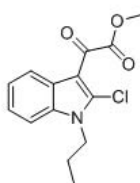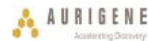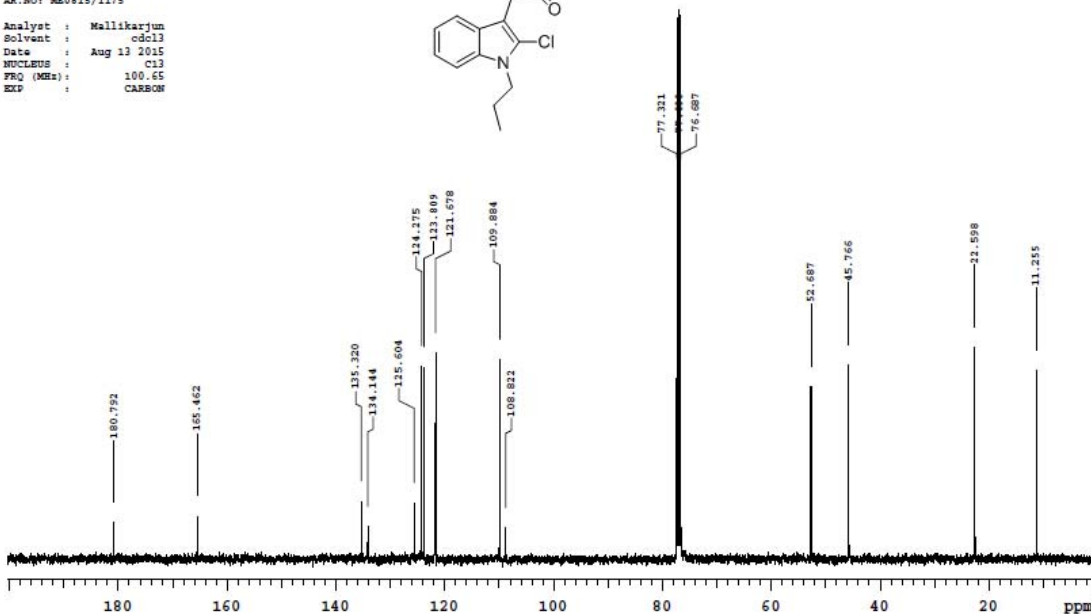

### Elemental Composition Report

Page 1

#### Single Mass Analysis

Tolerance = 7.0 PPM / DBE: min = -1.5, max = 80.0

Element prediction: Off

Number of isotope peaks used for i-FIT = 2

Monoisotopic Mass, Even Electron Ions

36 formula(e) evaluated with 1 results within limits (up to 20 best isotopic matches for each mass)

Elements Used:

C: 0-18 H: 0-25 N: 0-2 O: 0-3 Cl: 0-1

C108/CSAT4/033

150811010.8 (0.145) Cm (8:9)

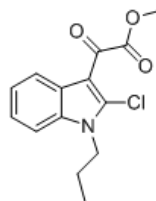

1: TOF MS ES+  
4.84e+004

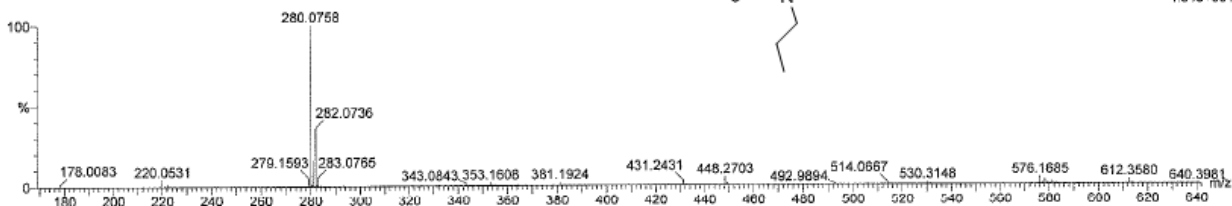

Minimum: -1.5  
Maximum: 80.0

| Mass     | Calc. Mass | mDa | PPM | DBE | i-FIT | Formula         |
|----------|------------|-----|-----|-----|-------|-----------------|
| 280.0758 | 280.0740   | 1.8 | 6.4 | 7.5 | 7.8   | C14 H15 N O3 Cl |

TDC-117-C108-CSAT4-036A

AR.No: MB0515/1427

Analyst : NARESH B  
Solvent : cdcl3  
Date : May 18 2015  
NUCLEUS : H1  
FRQ (MHz): 400.22  
EXP : PROTON

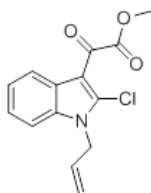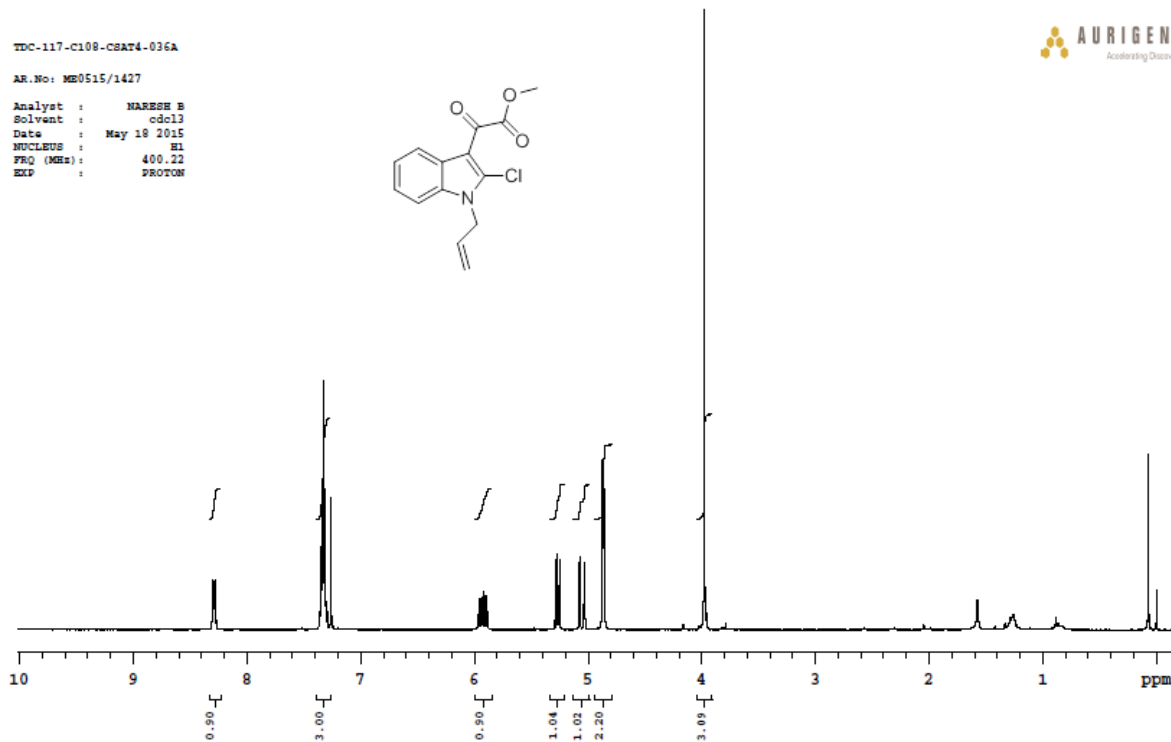

AURIGENE  
Accelerating Discovery

TDC-117 C108/CSAT4/036A

AR.No: MB0515/2035

Analyst : Mallikarjun  
Solvent : cdcl3  
Date : May 23 2015  
NUCLEUS : C13  
FRQ (MHz): 100.65  
EXP : CARBON

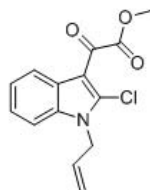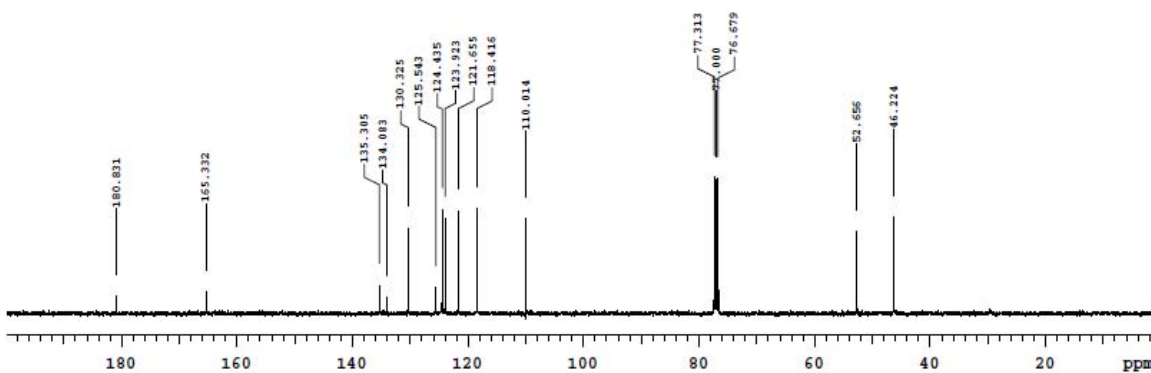

AURIGENE  
Accelerating Discovery

Elemental Composition Report

Single Mass Analysis

Tolerance = 7.0 PPM / DBE: min = -1.5, max = 80.0  
 Element prediction: Off  
 Number of isotope peaks used for i-FIT = 2

Monoisotopic Mass, Even Electron Ions  
 36 formula(e) evaluated with 1 results within limits (up to 20 best isotopic matches for each mass)  
 Elements Used:  
 C: 0-18 H: 0-25 N: 0-2 O: 0-3 Cl: 0-1  
 C108/CSAT4/036  
 150811011 22 (0.413) Cm (22:24)

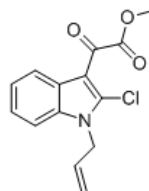

1: TOF MS ES+  
 3.48e+004

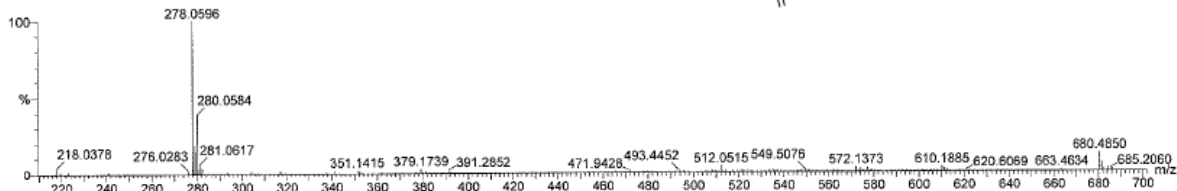

Minimum: -1.5  
 Maximum: 5.0 7.0 80.0

| Mass     | Calc. Mass | mDa | PPM | DBE | i-FIT | Formula         |
|----------|------------|-----|-----|-----|-------|-----------------|
| 278.0596 | 278.0584   | 1.2 | 4.3 | 8.5 | 60.5  | C14 H13 N O3 Cl |

TDC-117 C108/CSAT4/038A

AR.No: ME0615/25

Analyst : HARSH B  
 Solvent : cdcl3  
 Date : Jun 1 2015  
 NUCLEUS : H1  
 FREQ (MHz): 400.22  
 EXP : PROTON

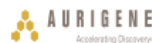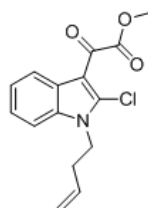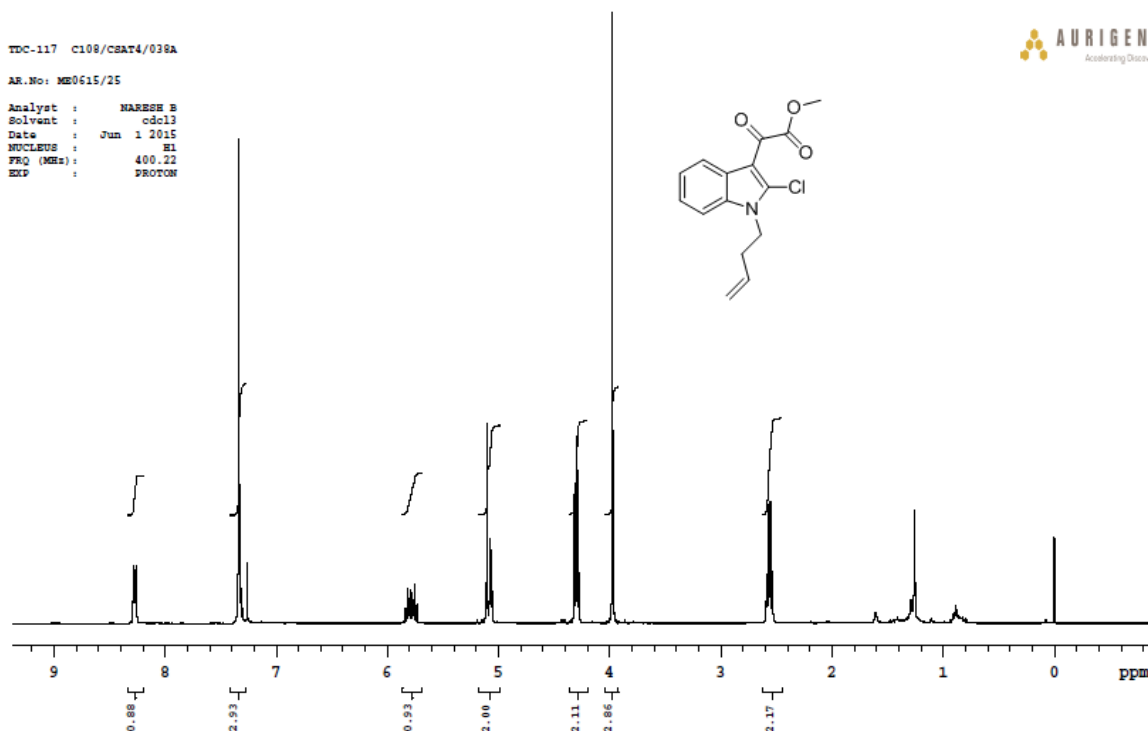

TDC-117 C108/CSAT4/038A

AR.No: ME0515/477

Analyst : Mallikarjun  
Solvent : cdcl3  
Date : Jun 5 2015  
NUCLEUS : C13  
FREQ (MHz): 100.65  
EXP : CARBON

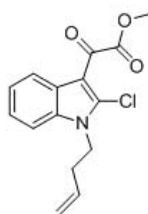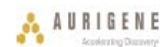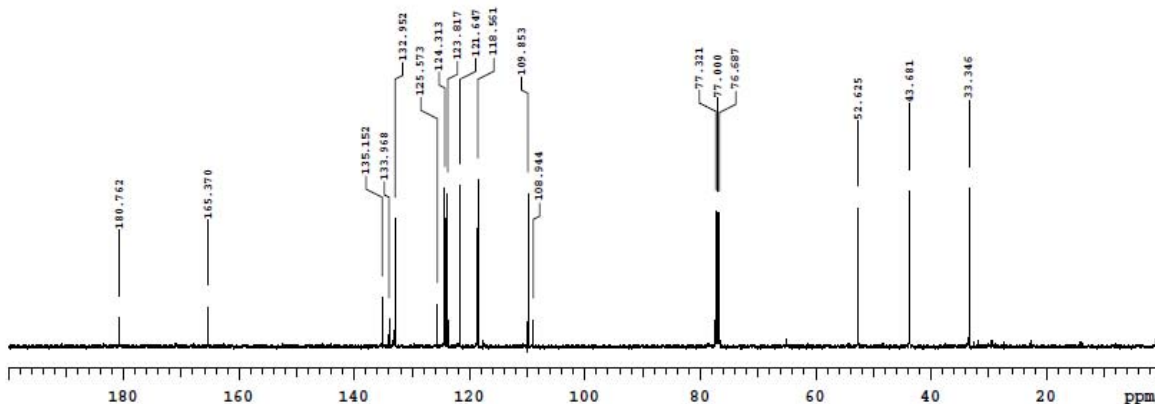

### Elemental Composition Report

Page 1

#### Single Mass Analysis

Tolerance = 5.0 PPM / DBE: min = -1.5, max = 80.0  
Element prediction: Off  
Number of isotope peaks used for i-FIT = 2

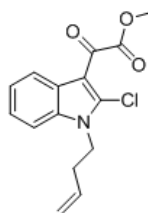

Monoisotopic Mass, Even Electron Ions  
55 formula(e) evaluated with 1 results within limits (up to 5 closest results for each mass)  
Elements Used:  
C: 0-18 H: 0-19 N: 0-2 O: 0-4 Cl: 0-2  
C108/CSAT4/038  
150603013 91 (1.684) Cm (89.91-102:104x0.500)

1: TOF MS ES+  
2.18e+003

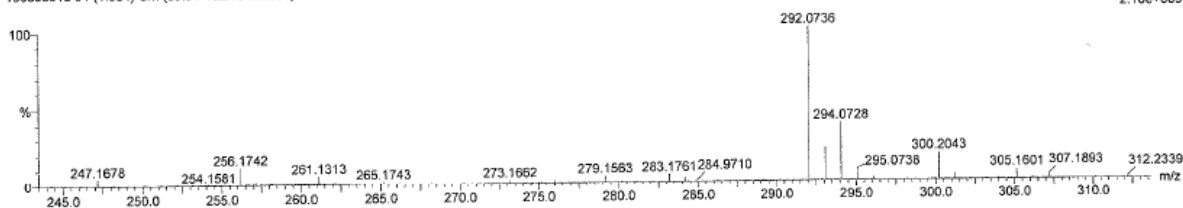

Minimum: -1.5  
Maximum: 80.0

| Mass     | Calc. Mass | mDa  | PPM  | DBE | i-FIT | Formula         |
|----------|------------|------|------|-----|-------|-----------------|
| 292.0736 | 292.0740   | -0.4 | -1.4 | 8.5 | 6.4   | C15 H15 N O3 Cl |

R. Nagarajan 03/06/2015

TDC-117 C108/CSAT4/035

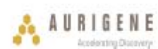

AR.No: MB0615/24

Analyst : Mallikarjun  
Solvent : cdcl3  
Date : Jun 1 2015  
NUCLEUS : H1  
FREQ (MHz): 400.22  
EXP : PROTON

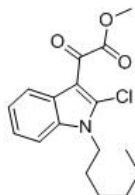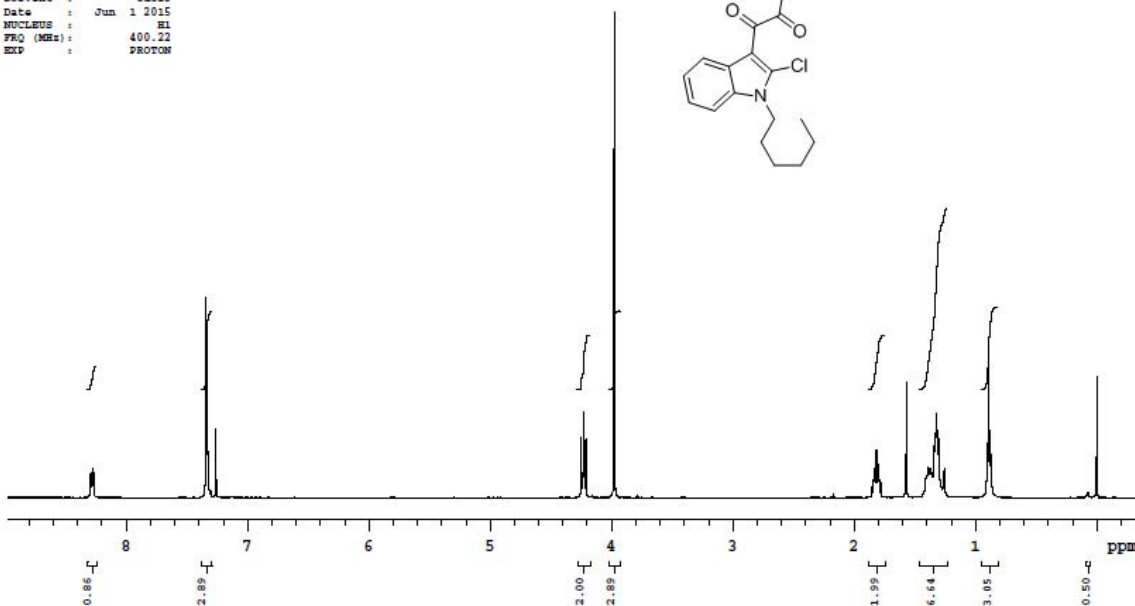

TDC-117 C108/CSAT4/035A

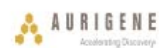

AR.No: MB0615/359

Analyst : Mallikarjun  
Solvent : cdcl3  
Date : Jun 5 2015  
NUCLEUS : C13  
FREQ (MHz): 100.65  
EXP : CARBON

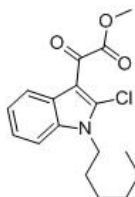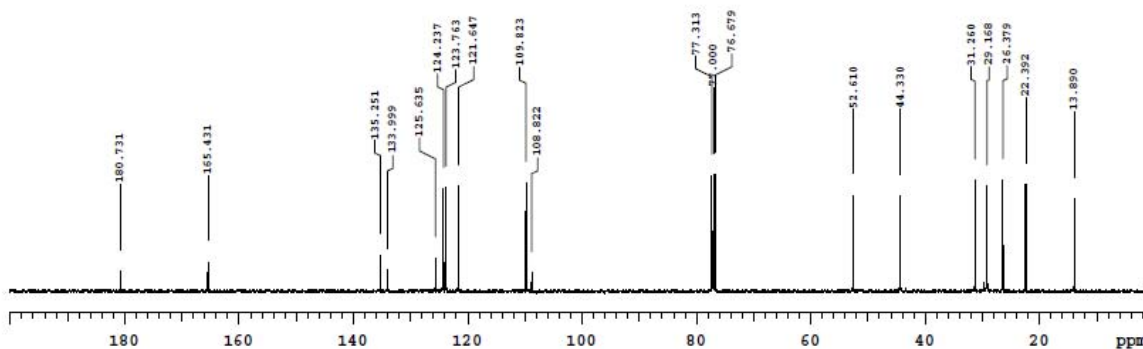

Elemental Composition Report

Single Mass Analysis

Tolerance = 5.0 PPM / DBE: min = -1.5, max = 80.0  
 Element prediction: Off  
 Number of isotope peaks used for I-FIT = 2

Monoisotopic Mass, Even Electron Ions  
 163 formula(e) evaluated with 1 results within limits (up to 5 closest results for each mass)  
 Elements Used:  
 C: 0-21 H: 0-25 N: 0-3 O: 0-6 Cl: 0-2  
 C108/CSAT4/035  
 150603009 39 (0.723) Cm (39.44-93:104x0.500)

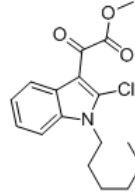

1: TOF MS ES+  
 1.28e+005

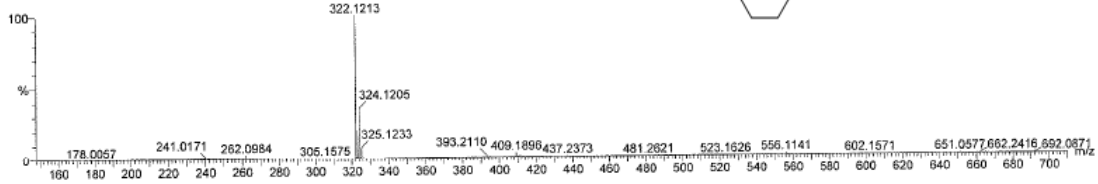

| Mass     | Calc. Mass | mDa | PPM | DBE | I-FIT | Formula         |
|----------|------------|-----|-----|-----|-------|-----------------|
| 322.1213 | 322.1210   | 0.3 | 0.9 | 7.5 | 3.5   | C17 H21 N O3 Cl |

*R. Nagarajan*  
 03/06/2015

TDC-117-C108-CSAT4-037A

AR.No: ME0515/1428

Analyst : NARSH B  
 Solvent : cdcl3  
 Date : May 18 2015  
 NUCLEUS : H1  
 FREQ (MHz): 400.22  
 EXC : PROTON

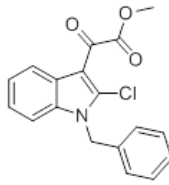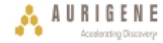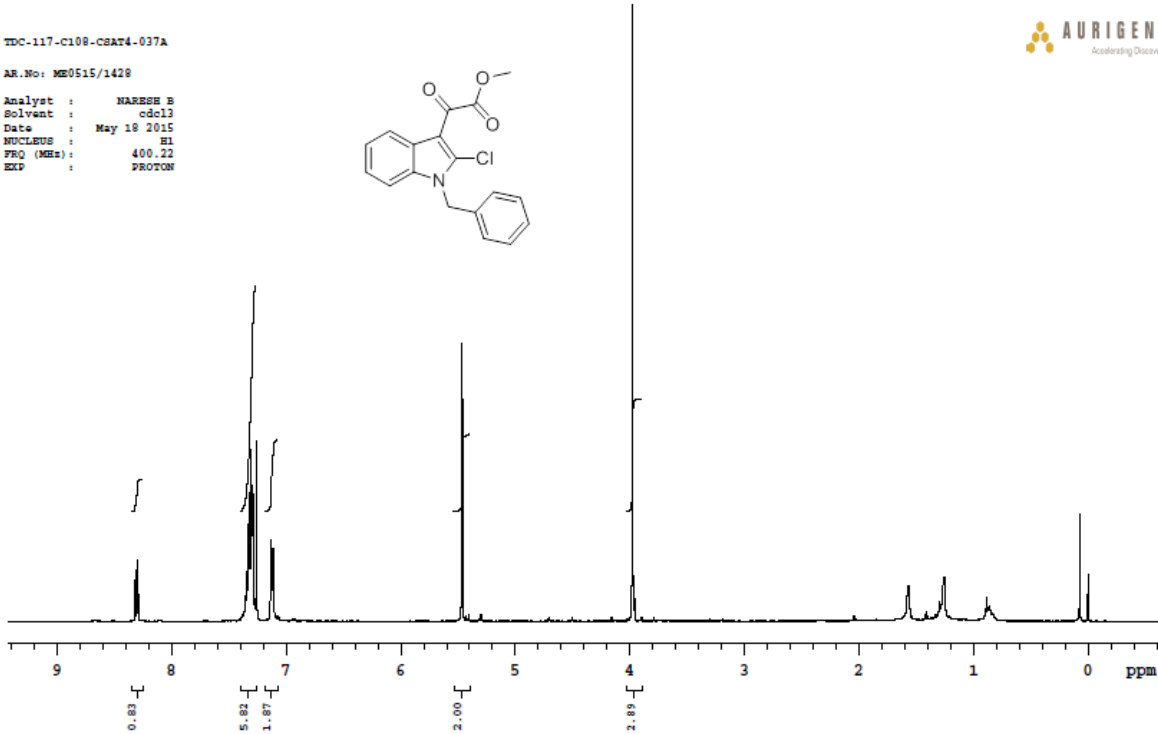



TDC-117 C108/CSAT4/037A

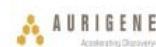

AR.No: ME0515/2036

Analyt : Mallikarjun  
Solvent : cdcl3  
Date : May 23 2015  
NUCLEUS : C13  
FREQ (MHz): 100.65  
EXP : CARBON

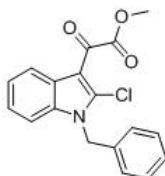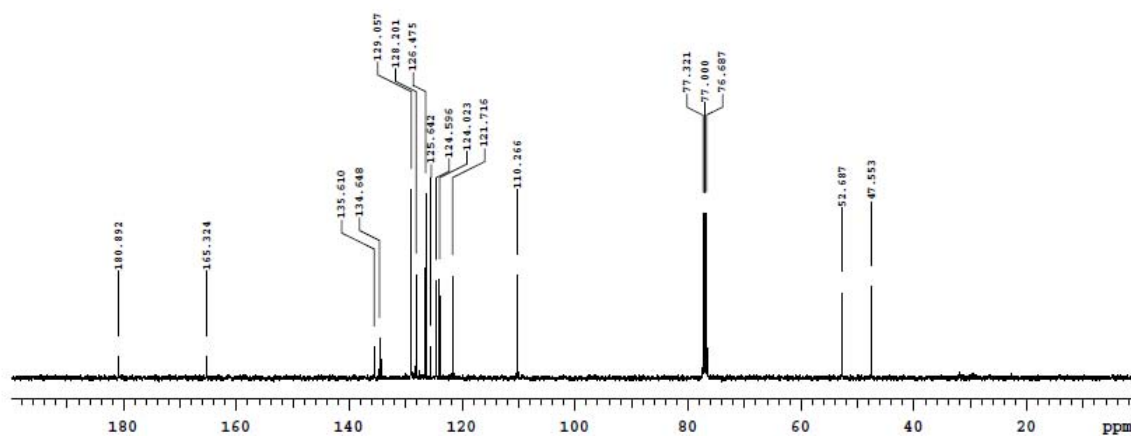

### Elemental Composition Report

Page 1

Tolerance = 5.0 PPM / DBE: min = -1.5, max = 80.0

Element prediction: Off

Number of isotope peaks used for I-FIT = 2

Monoisotopic Mass, Even Electron Ions

19 formula(e) evaluated with 1 results within limits (up to 20 best isotopic matches for each mass)

Elements Used:

C: 0-18 H: 0-25 N: 0-2 O: 0-3 Cl: 0-1

C108/CSAT4/037

150811013 17 (0.326) Cm (16:18)

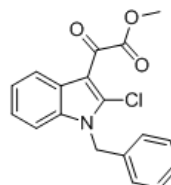

1: TOF MS ES+  
1.21e+005

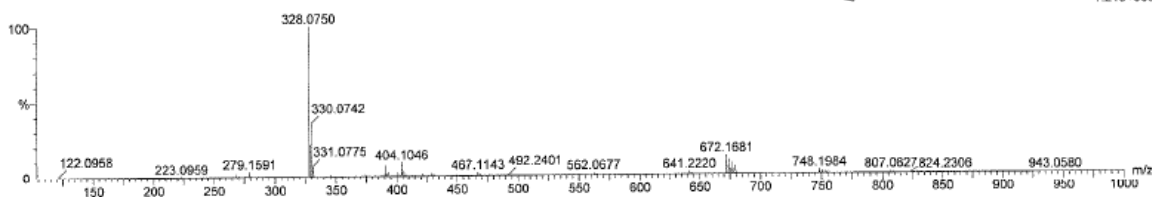

Minimum: 80.00  
Maximum: 100.00

| Mass     | RA     | Calc. Mass | mDa | PPM | DBE  | i-FIT | Formula         |
|----------|--------|------------|-----|-----|------|-------|-----------------|
| 328.0750 | 100.00 | 328.0740   | 1.0 | 3.0 | 11.5 | 30.4  | C18 H15 N O3 Cl |

TDC-119 C108/CSA74/049

AR.No: ME0815/1356

Analyst : Mallikarjun  
Solvent : cdcl3  
Date : Aug 14 2015  
NUCLEUS : H1  
FRQ (MHz): 400.22  
EXP : PROTON

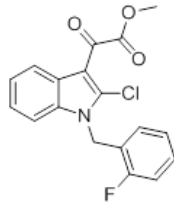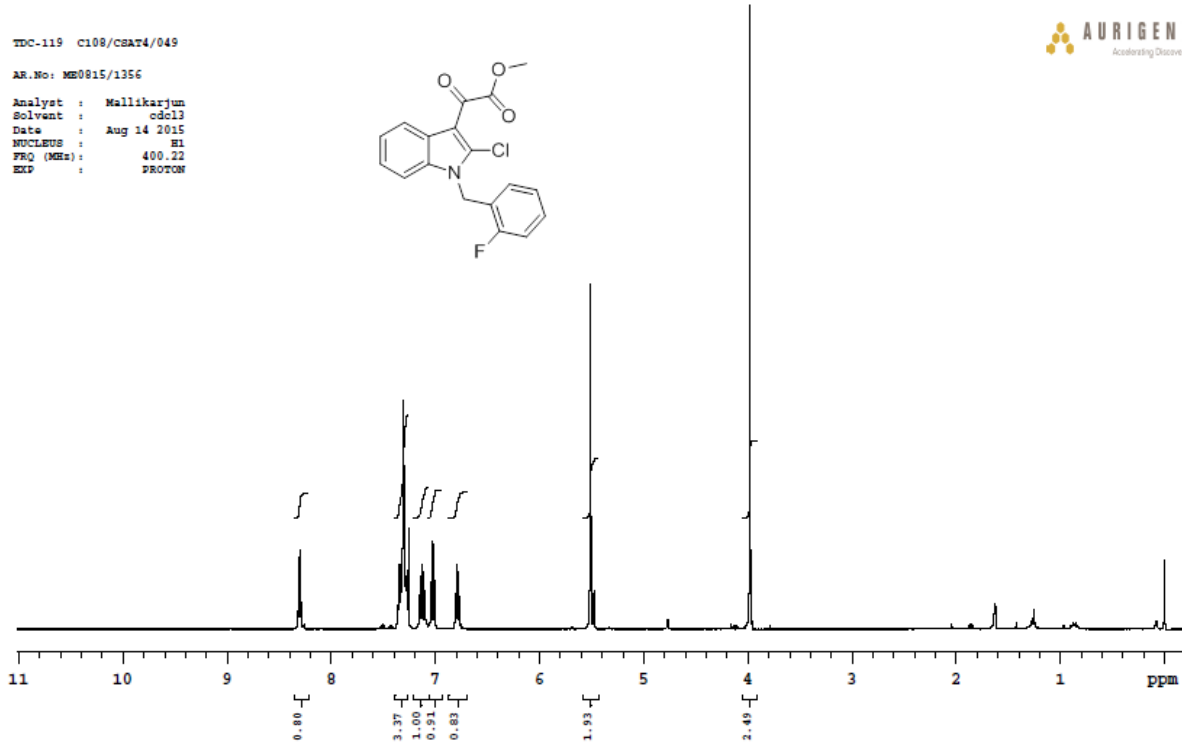

AURIGENE  
Accelerating Discovery

TDC-119 C108/CSA74/049

AR.No: ME0815/1450

Analyst : Mallikarjun  
Solvent : cdcl3  
Date : Aug 15 2015  
NUCLEUS : C13  
FRQ (MHz): 100.65  
EXP : CARBON

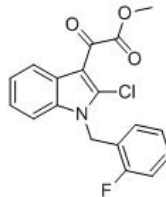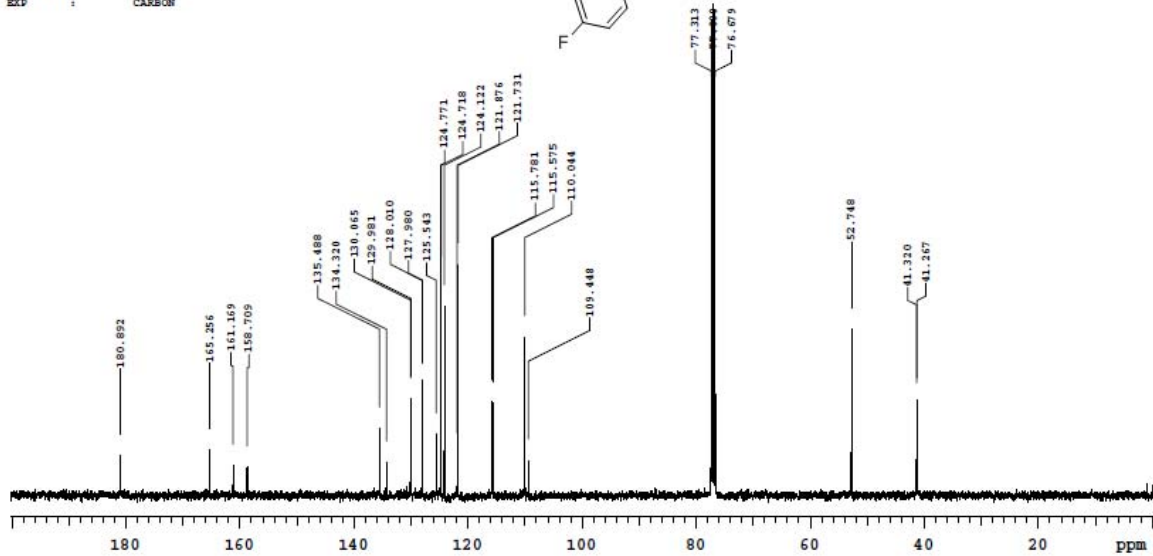

AURIGENE  
Accelerating Discovery

Elemental Composition Report

Single Mass Analysis

Tolerance = 5.0 PPM / DBE: min = -1.5, max = 80.0  
 Element prediction: Off  
 Number of isotope peaks used for i-FIT = 2

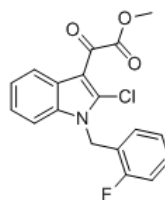

Monoisotopic Mass, Even Electron Ions  
 327 formula(e) evaluated with 1 results within limits (up to 20 closest results for each mass)  
 Elements Used:  
 C: 0-23 H: 0-35 N: 0-2 O: 0-4 F: 0-1 Cl: 0-3  
 C108/CSAT4/049  
 150826002 28 (0.515) Cm (28.31)

1: TOF MS ES+  
 2.79e+004

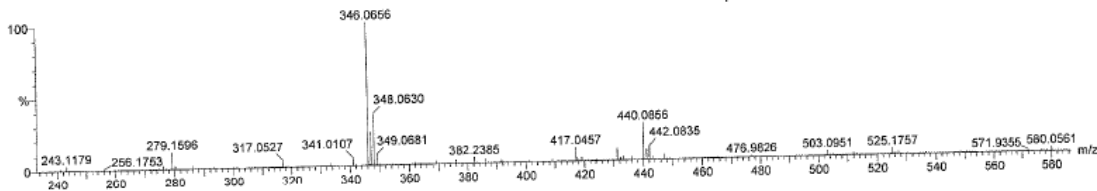

| Mass     | Calc. Mass | mDa | PPM | DBE  | i-FIT | Formula           |
|----------|------------|-----|-----|------|-------|-------------------|
| 346.0656 | 346.0646   | 1.0 | 2.9 | 11.5 | 38.6  | C18 H14 N O3 F Cl |

*B. Smit*  
 29/08/2015

TIC-119 C108/CSAT4/049A

AR.No: MB0815/1357

Analyst : Mallikarjun  
 Solvent : cdcl3  
 Date : Aug 14 2015  
 NUCLEUS : H1  
 PRQ (MHz): 400.22  
 EXP : PROTON

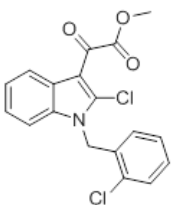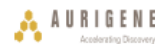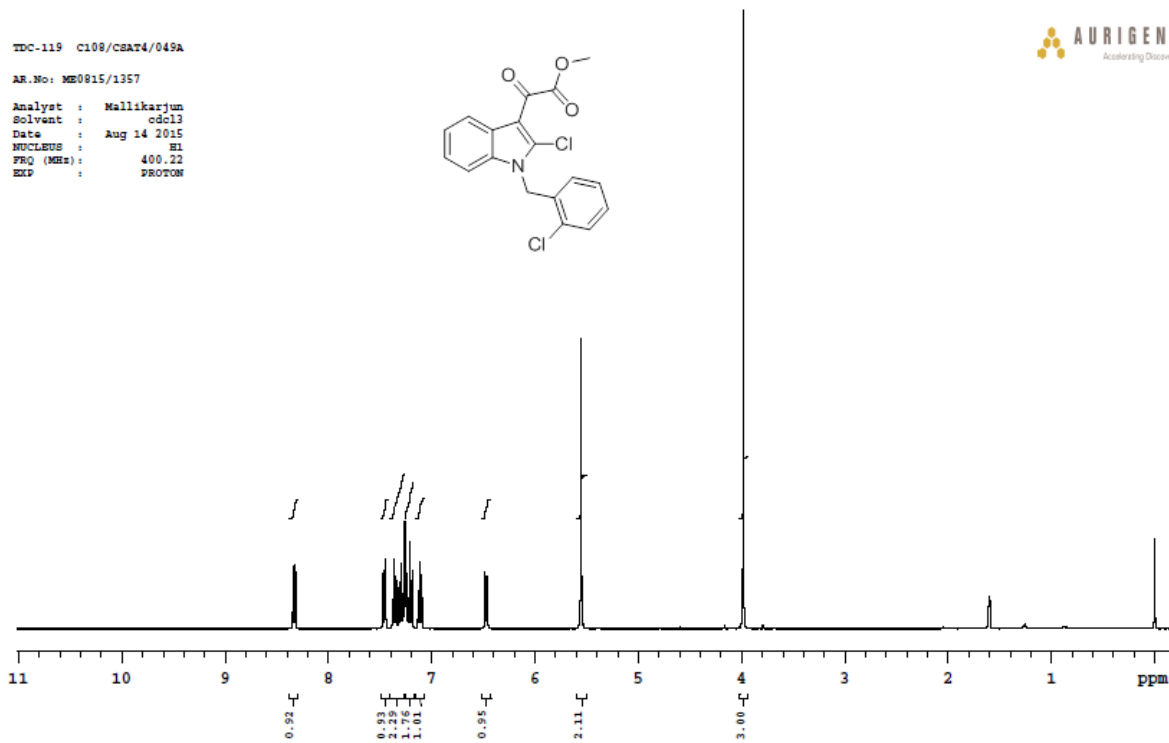

TDC-119 C108/CSAT4/049A

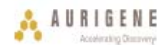

AR. No: ME0915/1451

Analyst : Mallikarjun  
Solvent : cdcl3  
Date : Aug 15 2015  
NUCLEUS : C13  
FREQ (MHz): 100.65  
EXP : CARBON

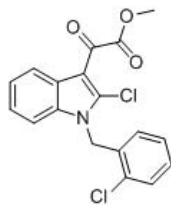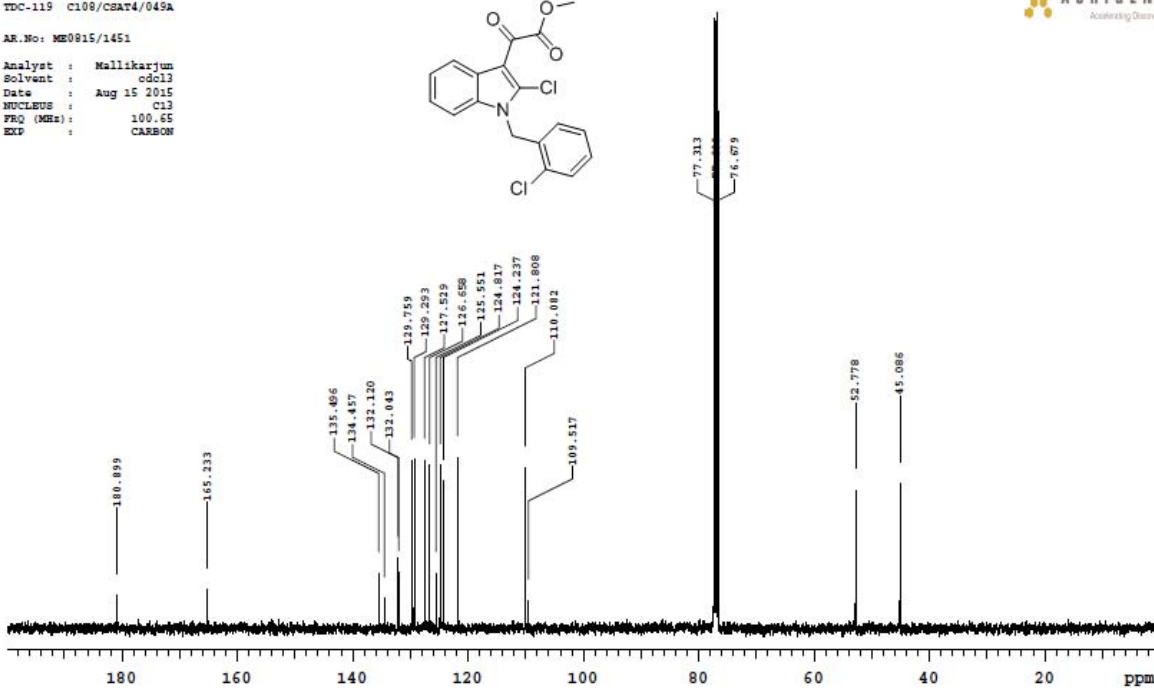

Elemental Composition Report

Single Mass Analysis

Tolerance = 8.0 PPM / DBE: min = -1.5, max = 80.0  
Element prediction: Off  
Number of isotope peaks used for i-FIT = 2

Monoisotopic Mass, Even Electron Ions  
142 formula(e) evaluated with 1 results within limits (up to 20 closest results for each mass)  
Elements Used:  
C: 0-23 H: 0-35 N: 0-2 O: 0-4 Cl: 0-3  
C108/CSAT4/049 A  
150826001 18 (0.339) Cm (18:19)

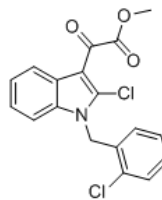

1: TOF MS ES+  
7.21e+004

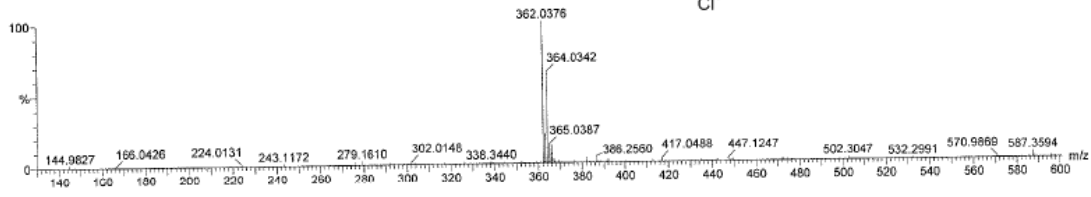

| Mass     | Calc. Mass | mDa | PPM | DBE  | i-FIT | Formula          |
|----------|------------|-----|-----|------|-------|------------------|
| 362.0376 | 362.0351   | 2.5 | 6.9 | 11.5 | 15.6  | C18 H14 N O3 Cl2 |

B. Smigat  
27 Aug 2015

# Indole fused- furo[2,3-*b*]quinoxalines(3)

TDC-004 C108/CSAT4/026 in DMSO

IMP-400MHz  
AR. No: ME1014/2109  
Analyst: Haribabu  
Date: 27th Oct. 2014

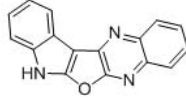

NUCLEUS : B1  
FRQ (MHz) : 400.22  
EXP : s2pul

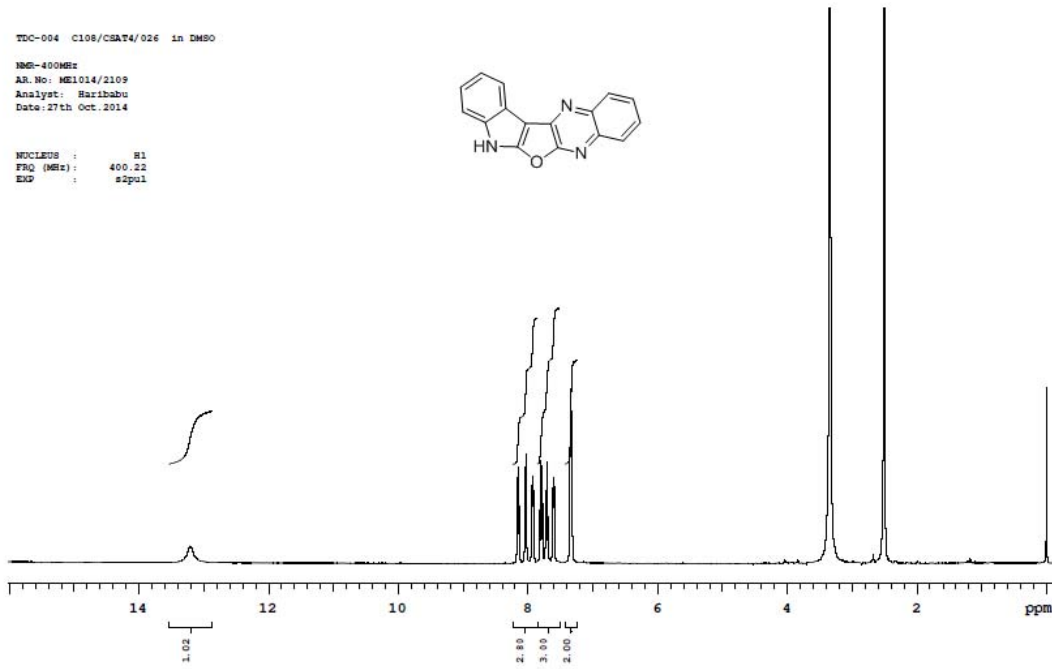

TDC-119 C108/CSAT4/024

AR. No: ME1214/2411

Analyst : NARESH B  
Solvent : DMSO  
Date : Dec 26 2014  
NUCLEUS : C13  
FRQ (MHz) : 100.65  
EXP :

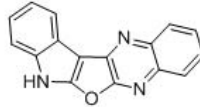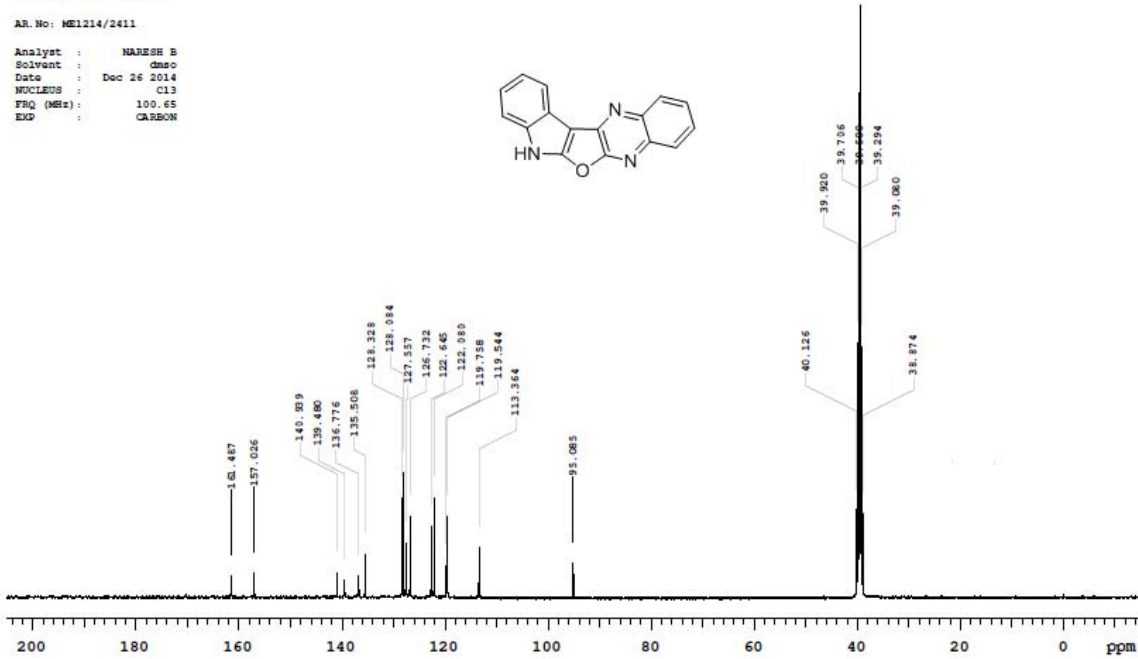

Elemental Composition Report

Single Mass Analysis

Tolerance = 5.0 PPM / DBE: min = -1.5, max = 50.0

Element prediction: Off

Number of isotope peaks used for i-FIT = 3

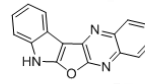

Monoisotopic Mass, Even Electron Ions

3 formula(e) evaluated with 1 results within limits (up to 50 best isotopic matches for each mass)

Elements Used:

C: 0-17 H: 0-12 N: 0-3 O: 0-1

C109/CSATY/025

141204014 32 (0.301) Cm (31:35-80:93)

1: TOF MS ES+  
4.30e+003

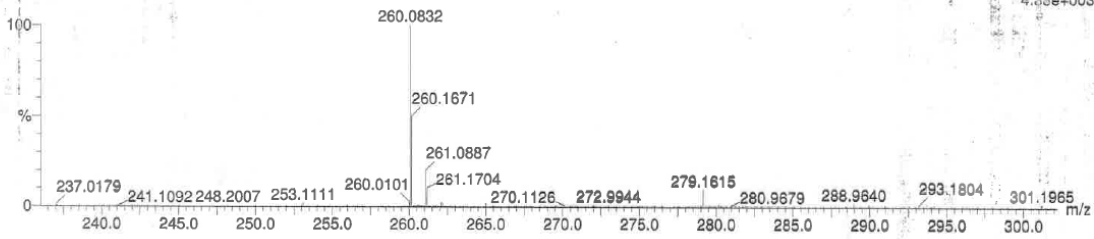

Minimum: -1.5  
Maximum: 5.0 5.0 50.0

| Mass     | Calc. Mass | mDa | PPM | DBE  | i-FIT | Formula      |
|----------|------------|-----|-----|------|-------|--------------|
| 260.0832 | 260.0824   | 0.8 | 3.1 | 13.5 | 2.1   | C16 H10 N3 O |

TDC-117-C108-CSAT4-031

AR.No: ME0515/2

Analyst : HARSH B  
Solvent : cdcl3  
Date : May 4 2015  
NUCLEUS : H1  
PFI (MHz): 400.22  
EXP : PROTON

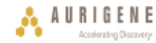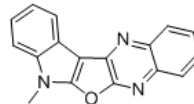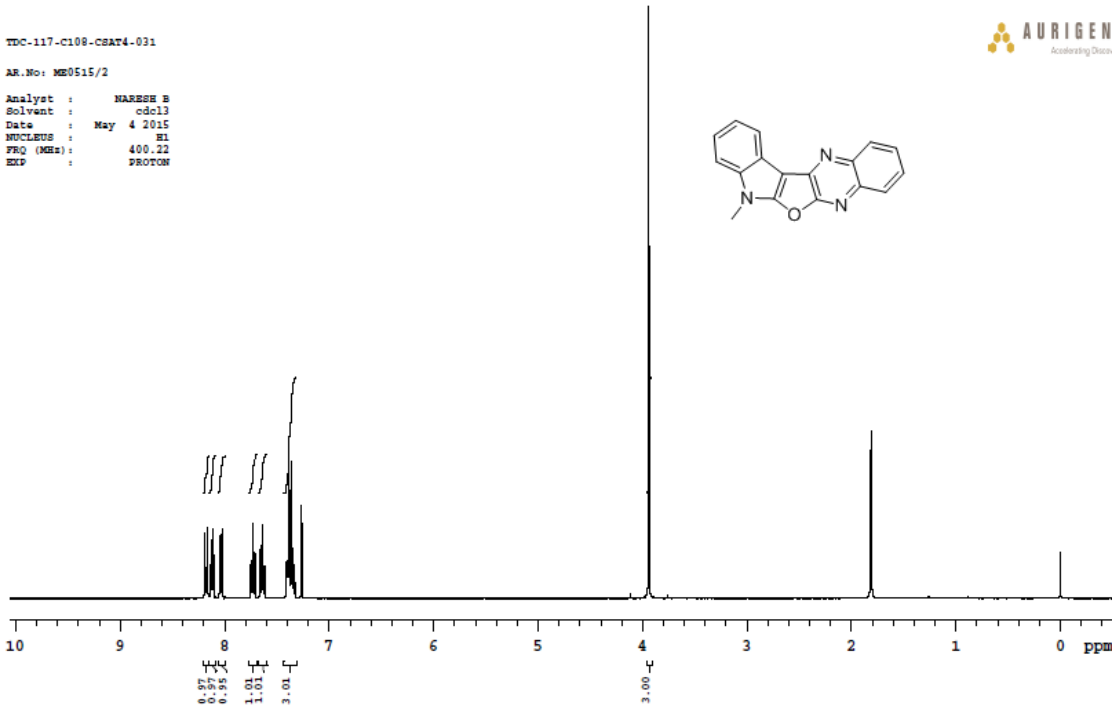

TDC-117 C108/CSAT4/031

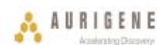

AR.No: ME0515/381

Analyst : NARESH B  
Solvent : cdcl3  
Date : May 7 2015  
NUCLEUS : C13  
PRQ (MHz): 100.65  
EXP :

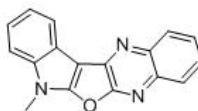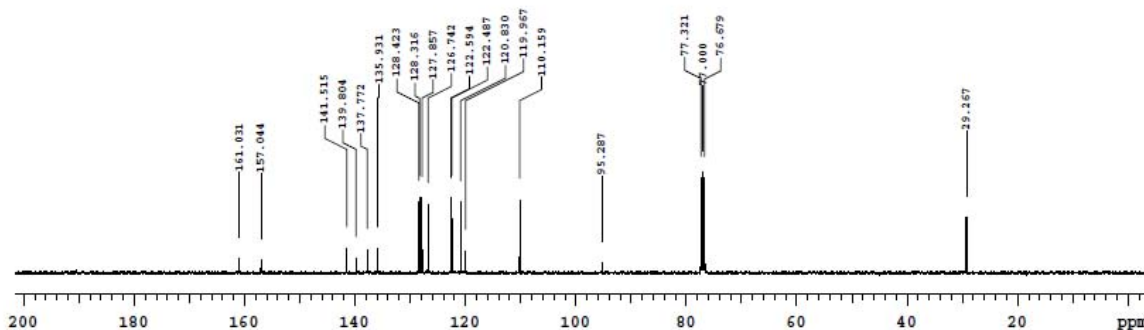

### Elemental Composition Report

Page 1

#### Single Mass Analysis

Tolerance = 5.0 PPM / DBE: min = -1.5, max = 80.0

Element prediction: Off

Number of isotope peaks used for i-FIT = 4

Monoisotopic Mass, Even Electron Ions

25 formula(e) evaluated with 1 results within limits (up to 20 best isotopic matches for each mass)

Elements Used:

C: 0-21 H: 0-25 N: 0-3 O: 0-2

C108/CSAT4/031

150506002 21 (0.580) Cm (21:24-42:48x0.500)

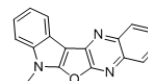

1: TOF MS ES+  
4.12e+004

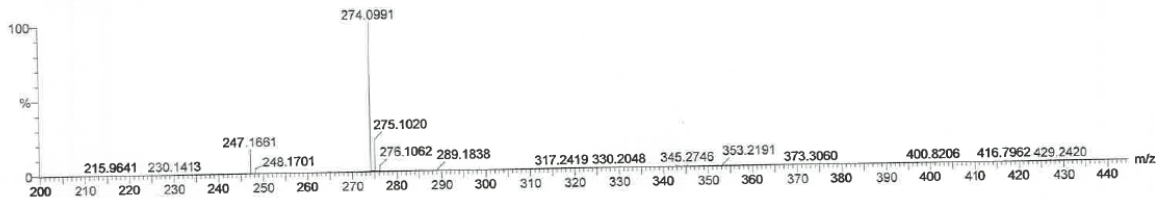

| Mass     | Calc. Mass | mDa | PPM | DBE  | i-FIT | Formula      |
|----------|------------|-----|-----|------|-------|--------------|
| 274.0991 | 274.0980   | 1.1 | 4.0 | 13.5 | 113.0 | C17 H12 N3 O |

*R-Nage Redy 06/05/2015*

TDC-117 C108/CSAT5/032

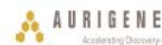

AR.No: ME0415/2954

Analyst : NARESH B  
Solvent : cdcl3  
Date : Apr 30 2015  
NUCLEUS : H1  
FREQ (MHz): 400.22  
EXP : PROTON

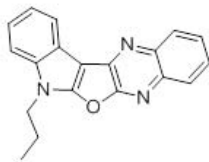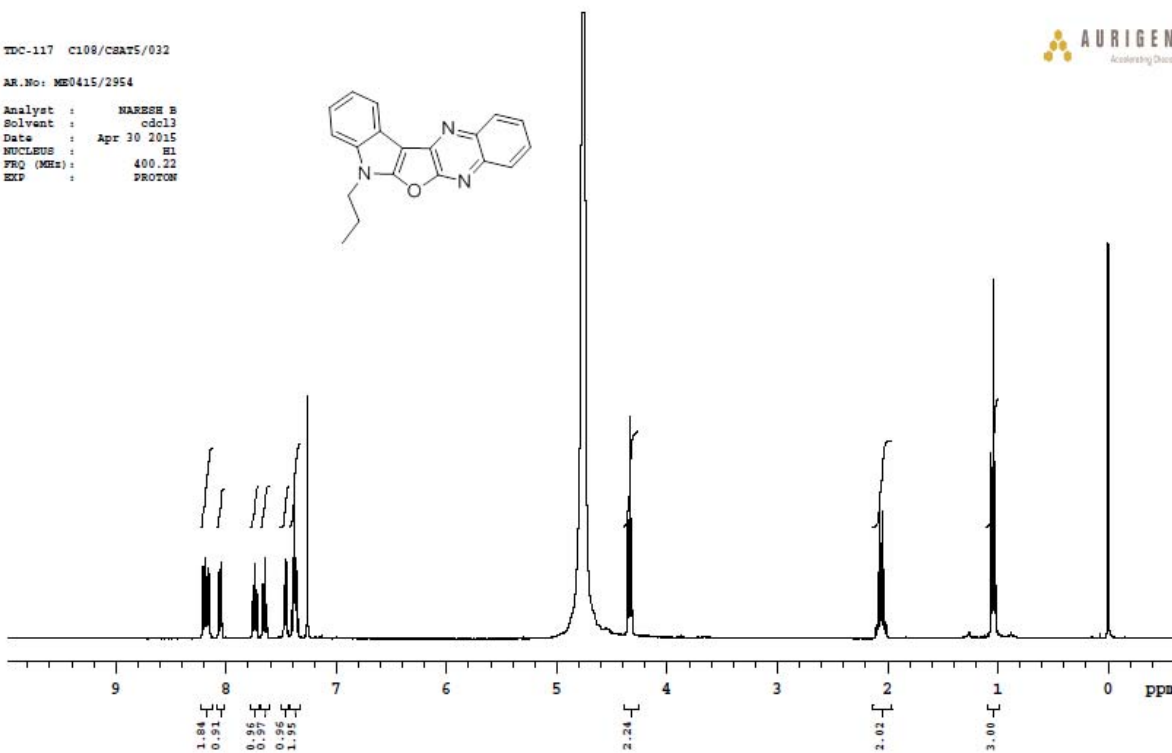

TDC-117 C108/CSAT5/032

AR.No: ME0415/3064

Analyst : Mallikarjun  
Solvent : cdcl3  
Date : May 2 2015  
NUCLEUS : C13  
FREQ (MHz): 100.65  
EXP : CARBON

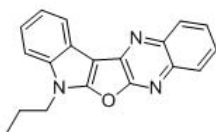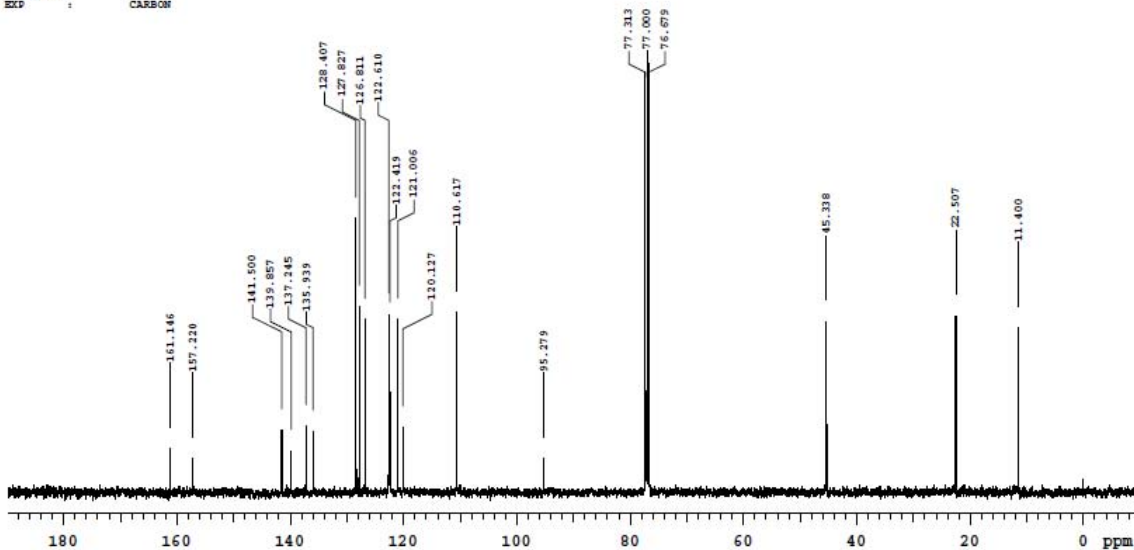



Elemental Composition Report

Single Mass Analysis

Tolerance = 5.0 PPM / DBE: min = -1.5, max = 80.0  
 Element prediction: Off  
 Number of isotope peaks used for i-FIT = 4

Monoisotopic Mass, Even Electron Ions  
 16 formula(e) evaluated with 1 results within limits (up to 20 best isotopic matches for each mass)  
 Elements Used:  
 C: 0-21 H: 0-25 N: 0-3 O: 0-2  
 C108/CSATS/032  
 150506001 15 (0.406) Cm (15:19-37:39x0.500)

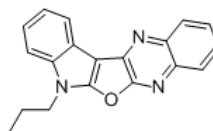

1: TOF MS ES+  
 1.01e+005

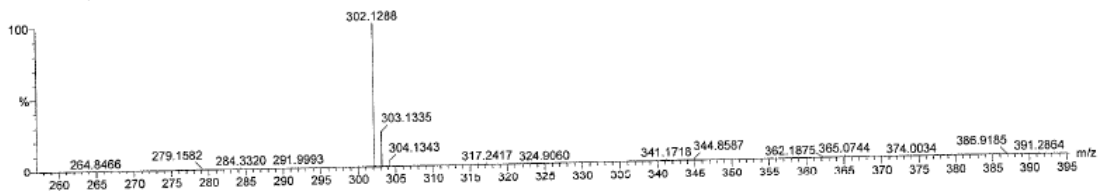

| Mass     | Calc. Mass | mDa  | PPM  | DBE  | i-FIT | Formula      |
|----------|------------|------|------|------|-------|--------------|
| 302.1288 | 302.1293   | -0.5 | -1.7 | 13.5 | 82.4  | C19 H16 N3 O |

*R. Narayana Reddy*  
*06/09/2015*

TDC-117-C108-CSATS-036

AR.No: ME0515/1392

Analyst : NARESH B  
 Solvent : cdcl3  
 Date : May 18 2015  
 NUCLEUS : H1  
 FREQ (MHz): 400.22  
 EXP : PROTON

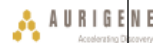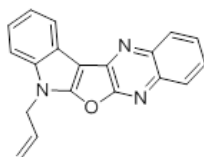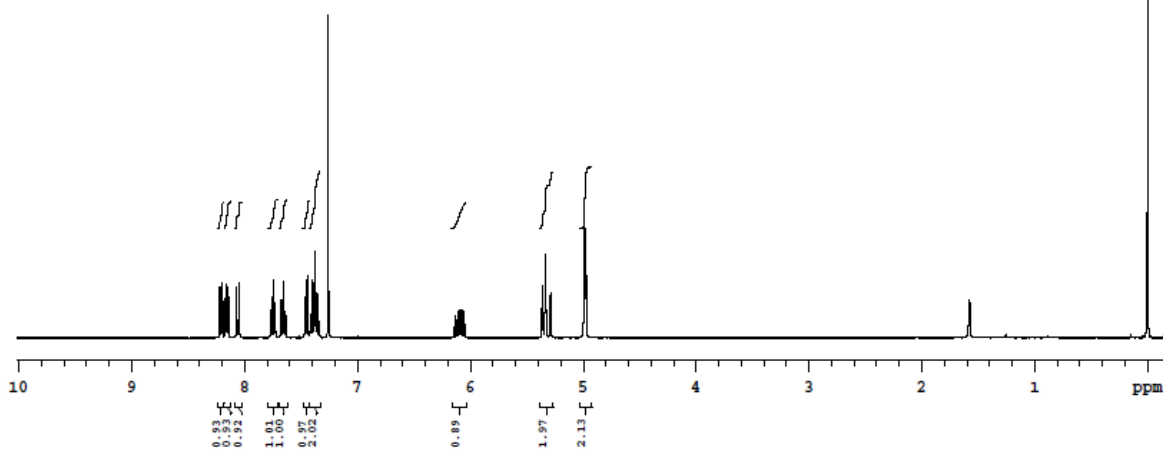

TDC-117 C108/CSAT5/036

AR.No: ME0515/1480

Analyst : NARESH B  
Solvent : cdcl3  
Date : May 18 2015  
NUCLEUS : C13  
FREQ (MHz) : 100.65  
EXP : CARBON

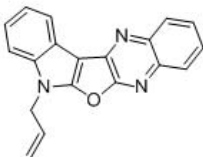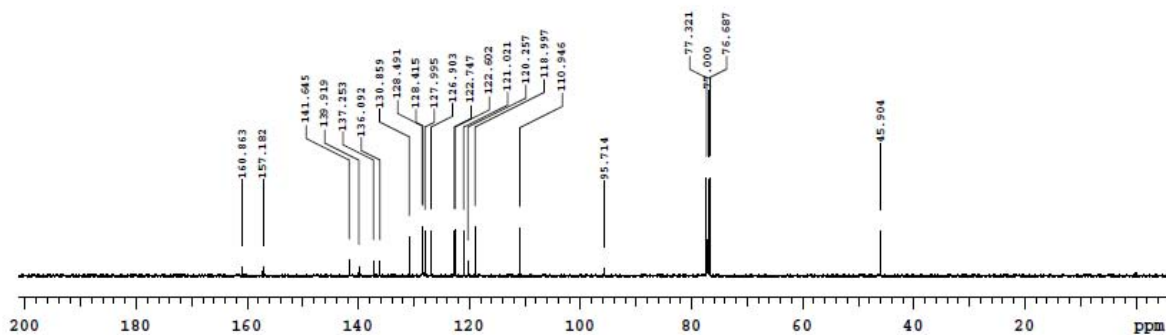

### Elemental Composition Report

Page 1

#### Single Mass Analysis

Tolerance = 5.0 PPM / DBE: min = -1.5, max = 80.0

Element prediction: Off

Number of isotope peaks used for i-FIT = 2

Monoisotopic Mass, Even Electron Ions

34 formula(e) evaluated with 1 results within limits (up to 4 best isotopic matches for each mass)

Elements Used:

C: 0-23 H: 0-17 N: 0-5 O: 0-3

C108/CSAT5/036

150518002 7 (0.131) Cm (6.8-63.75x0.500)

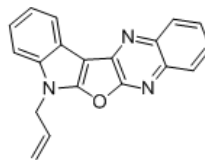

1: TOF MS ES+  
1.77e+005

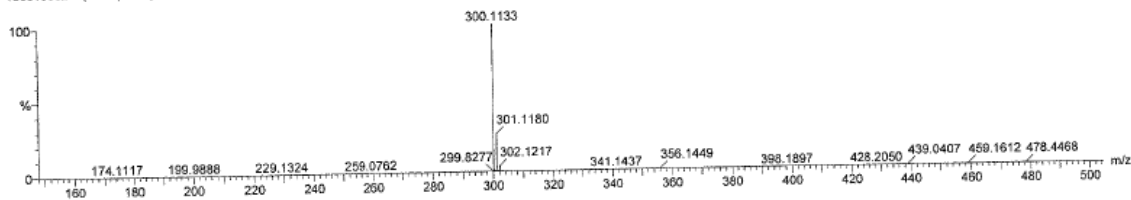

| Minimum: |            |      |      | -1.5 |       |              |  |
|----------|------------|------|------|------|-------|--------------|--|
| Maximum: |            | 5.0  | 5.0  | 80.0 |       |              |  |
| Mass     | Calc. Mass | mDa  | PPM  | DBE  | i-FIT | Formula      |  |
| 300.1133 | 300.1137   | -0.4 | -1.3 | 14.5 | 230.9 | C19 H14 N3 O |  |

R. Nagarajan  
18/05/2015

TDC-117 C108/CSAT5/038

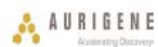

AR.No: ME0615/189

Analyst : Mallikarjun  
Solvent : cdcl3  
Date : Jun 3 2015  
NUCLEUS : H1  
FRQ (MHz): 400.22  
EXP : PROTON

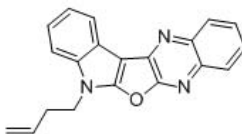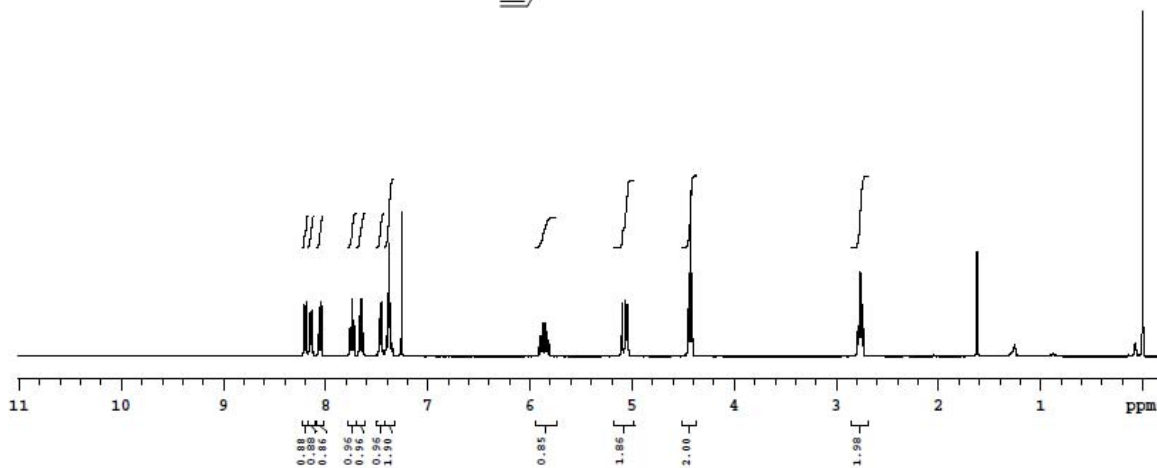

TDC-119 C108/CSAT5/038

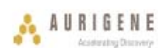

AR.No: ME0815/547

Analyst : Mallikarjun  
Solvent : cdcl3  
Date : Aug 7 2015  
NUCLEUS : C13  
FRQ (MHz): 100.65  
EXP : CARBON

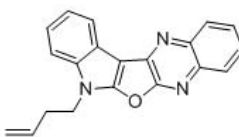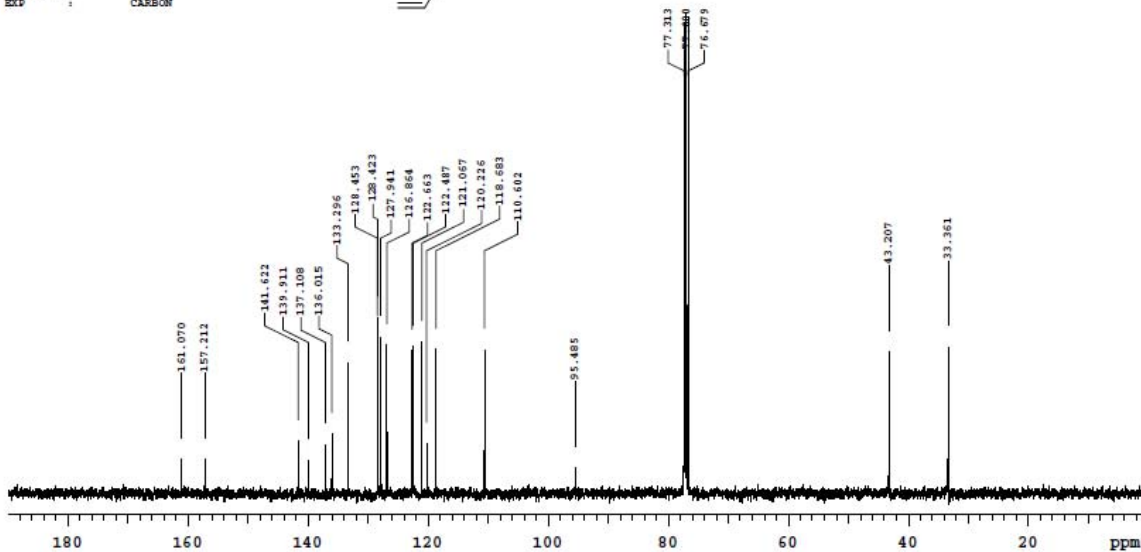

Elemental Composition Report

Single Mass Analysis

Tolerance = 5.0 PPM / DBE: min = -1.5, max = 80.0  
 Element prediction: Off  
 Number of isotope peaks used for i-FIT = 2

Monoisotopic Mass, Even Electron Ions  
 39 formula(e) evaluated with 1 results within limits (up to 5 closest results for each mass)  
 Elements Used:  
 C: 0-25 H: 0-18 N: 0-5 O: 0-3  
 C108/CSAT5/038  
 150603014 25 (0.473) Cm (25.28-65.68x0.500)

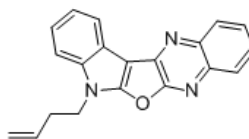

1: TOF MS ES+  
 1.31e+005

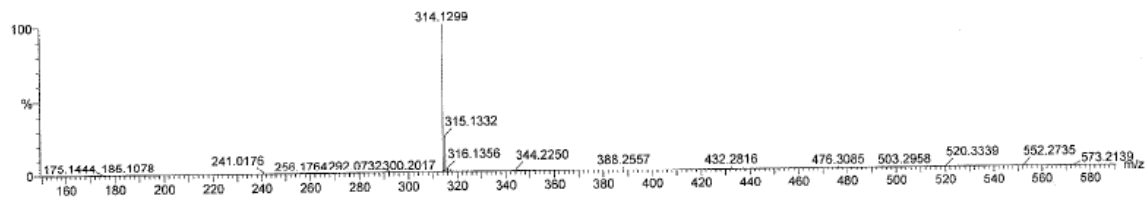

| Minimum: |            |     |     | -1.5 |       |              |
|----------|------------|-----|-----|------|-------|--------------|
| Maximum: | 5.0        | 5.0 |     | 80.0 |       |              |
| Mass     | Calc. Mass | mDa | PPM | DBE  | i-FIT | Formula      |
| 314.1299 | 314.1293   | 0.6 | 1.9 | 14.5 | 47.0  | C20 H16 N3 O |

*R. No. = 117-117-038 (2015)*

TDC-117-C108-CSAT5-035

AR.No: MS0615/57

Analyst : Mallikarjun  
 Solvent : cdCl3  
 Date : Jun 1 2015  
 NUCLEUS : H1  
 FREQ (MHz): 400.22  
 EXP : PROTON

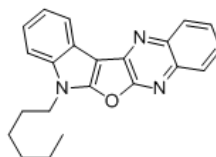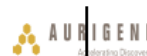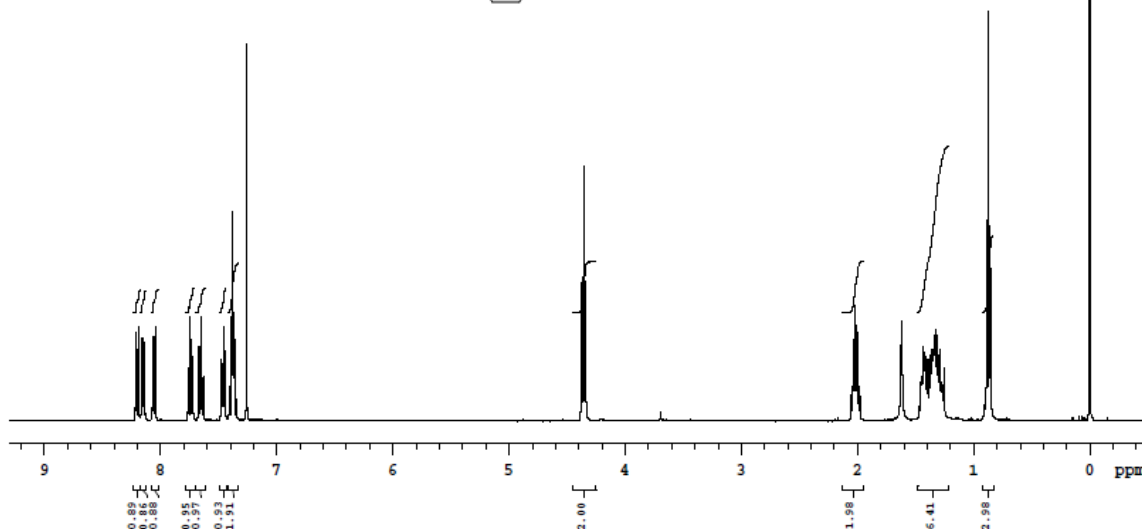

TDC-117 C108/CSAT5/035

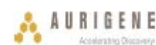

AR.No: MB0615/251

Analyst : Mallikarjun  
Solvent : cdcl3  
Date : Jun 3 2015  
NUCLEUS : C13  
PFG (MHz) : 100.65  
EXP :

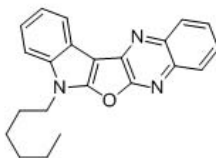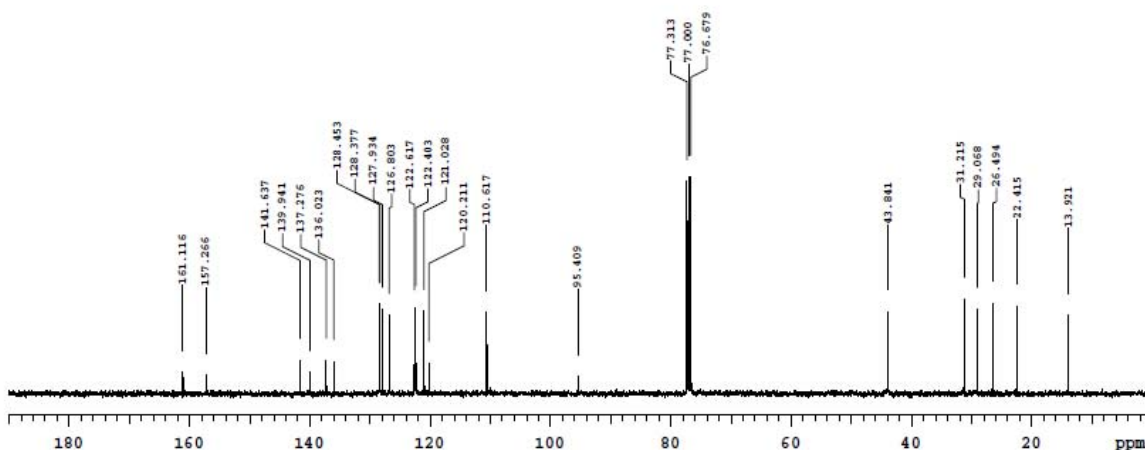

### Elemental Composition Report

Page 1

#### Single Mass Analysis

Tolerance = 5.0 PPM / DBE: min = -1.5, max = 80.0

Element prediction: Off

Number of isotope peaks used for i-FIT = 2

Monoisotopic Mass, Even Electron Ions

82 formula(e) evaluated with 1 results within limits (up to 5 closest results for each mass)

Elements Used:

C: 0-25 H: 0-25 N: 0-5 O: 0-6

C108/CSAT5/035

150603011 68 (1.255) Cm (68.71-68.88x0.500)

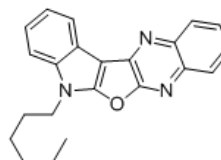

1: TOF MS ES+  
1.54e+005

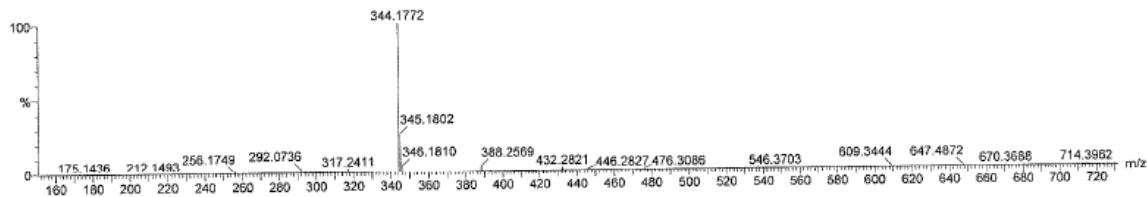

| Minimum: |            |     |     | -1.5 |       |              |
|----------|------------|-----|-----|------|-------|--------------|
| Maximum: | 5.0        | 5.0 |     | 80.0 |       |              |
| Mass     | Calc. Mass | mDa | PPM | DBE  | i-FIT | Formula      |
| 344.1772 | 344.1763   | 0.9 | 2.6 | 13.5 | 3.9   | C22 H22 N3 O |

R. Narayana  
03/06/2015

TDC-117-C108-CSAT5-037

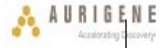

AR.No: MB0515/1391

Analyst : NARESH B  
Solvent : cdcl3  
Date : May 18 2015  
NUCLEUS : H1  
FREQ (MHz): 400.12  
EXP : PROTON

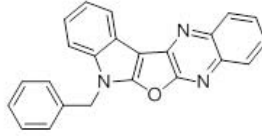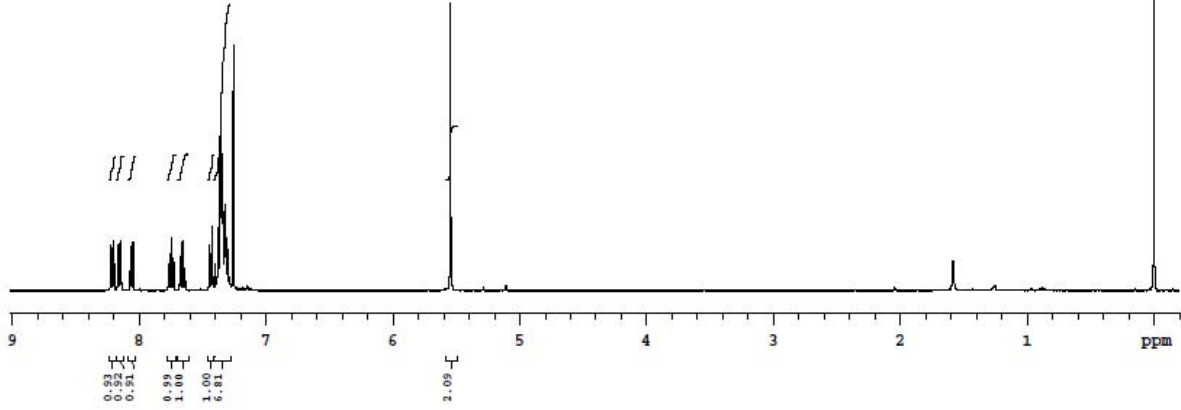

TDC-117 C108/CSAT5/037

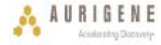

AR.No: MB0515/1481

Analyst : NARESH B  
Solvent : cdcl3  
Date : May 19 2015  
NUCLEUS : C13  
FREQ (MHz): 100.65  
EXP : CARBON

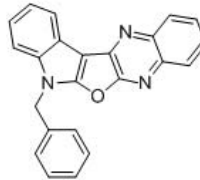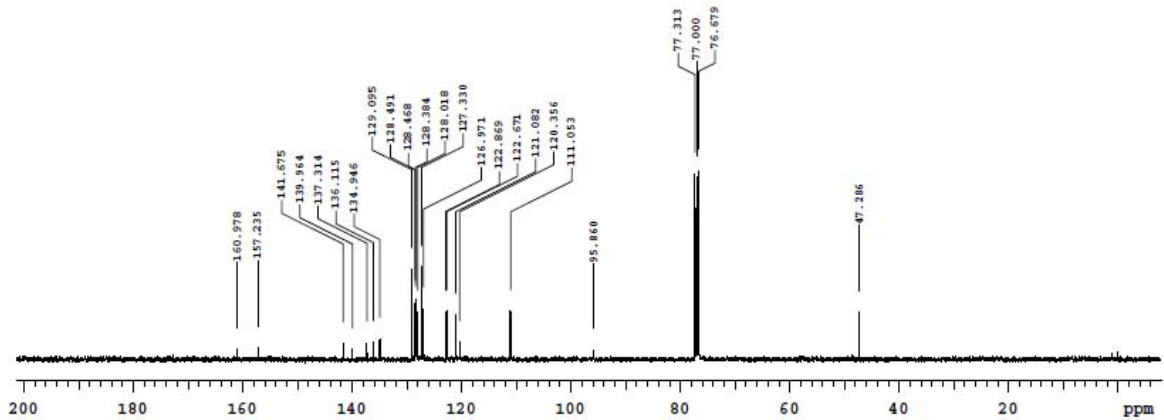

## Elemental Composition Report

## Single Mass Analysis

Tolerance = 5.0 PPM / DBE: min = -1.5, max = 80.0  
 Element prediction: Off  
 Number of isotope peaks used for i-FIT = 2

Monoisotopic Mass, Even Electron Ions  
 32 formula(e) evaluated with 1 results within limits (up to 4 best isotopic matches for each mass)  
 Elements Used:  
 C: 0-25 H: 0-19 N: 0-5 O: 0-3  
 C108/CSAT5/037  
 150518003 50 (0.930) Cm (49:54-83:88x0.500)

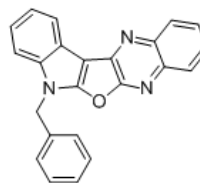

1: TOF MS ES+  
 1.38e+004

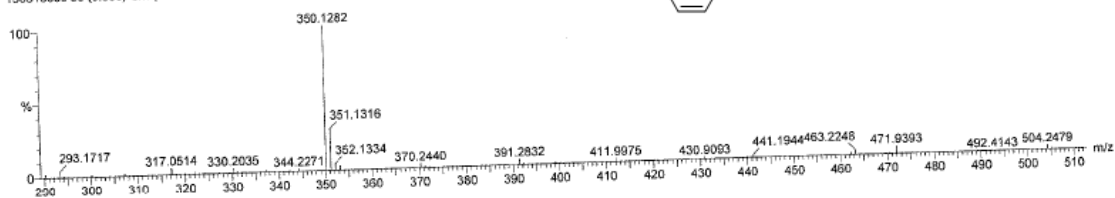

| Mass     | Calc. Mass | mDa  | PPM  | DBE  | i-FIT | Formula      |
|----------|------------|------|------|------|-------|--------------|
| 350.1282 | 350.1293   | -1.1 | -3.1 | 17.5 | 4.6   | C23 H16 N3 O |

*12. Nagendra  
 12/05/2015*

TDC-119 C108/CSAT5/048

AR.No: MB0715/2555

Analyst : Mallikarjun  
 Solvent : cdcl3  
 Date : Jul 27 2015  
 NUCLEUS : H1  
 FREQ (MHz) : 400.22  
 EXP : PROTON

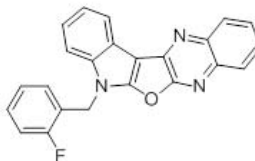

**AURIGENE**  
 Accelerating Discovery

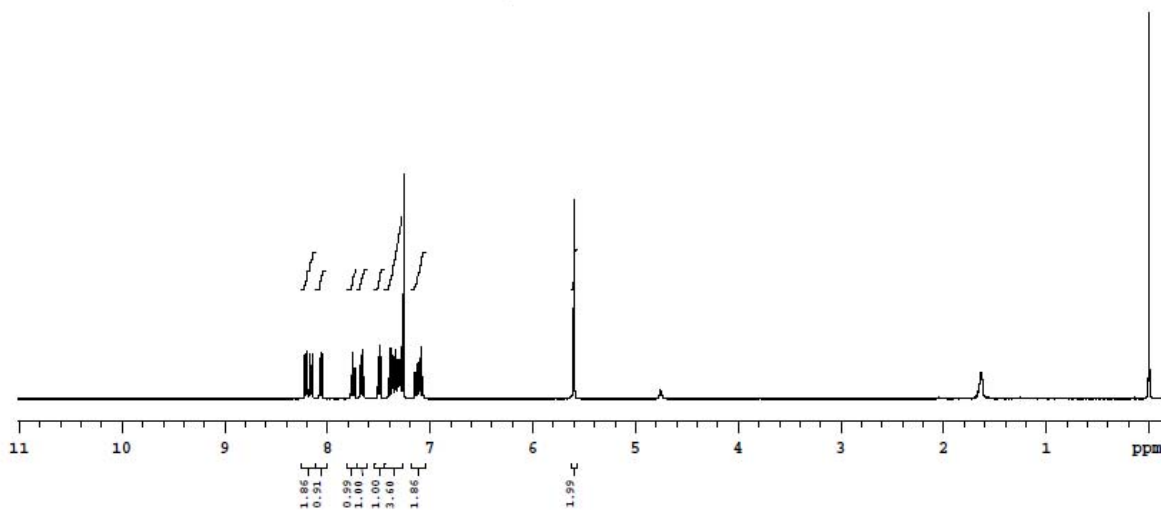

TDC-119 C108/CSAT5/048

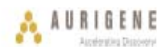

AR.No: ME0815/716

Analyst : Mallikarjun  
Solvent : CDCl3  
Date : Aug 8 2015  
NUCLBUS : C13  
FREQ (MHz): 100.65  
EXP : CARBON

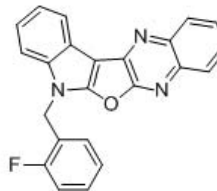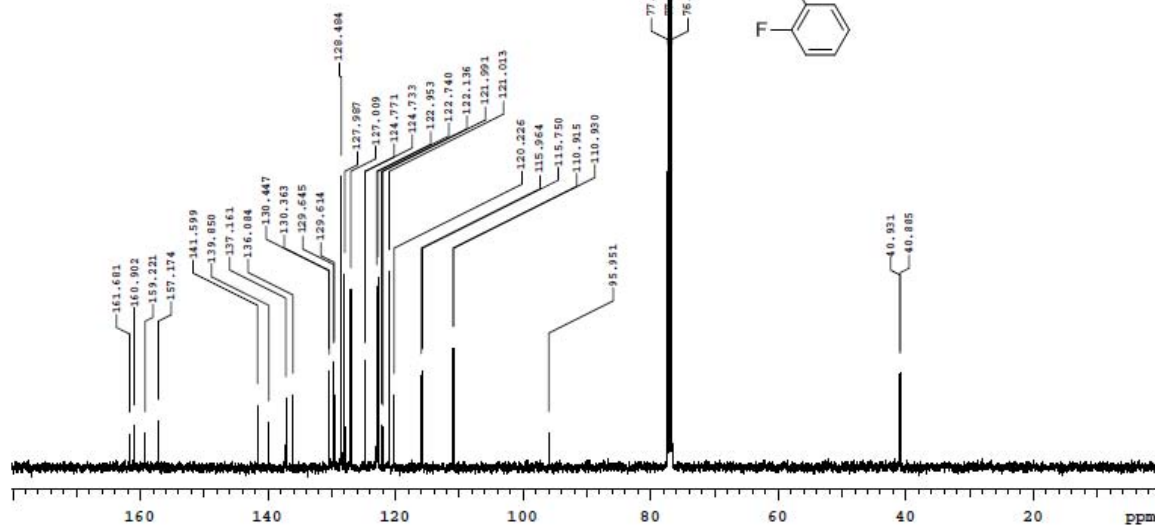

### Elemental Composition Report

Page 1

#### Single Mass Analysis

Tolerance = 5.0 PPM / DBE: min = -1.5, max = 80.0

Element prediction: Off

Number of isotope peaks used for i-FIT = 2

Monoisotopic Mass, Even Electron Ions

39 formula(e) evaluated with 1 results within limits (up to 20 best isotopic matches for each mass)

Elements Used:

C: 0-25 H: 0-25 N: 0-4 O: 0-2 F: 0-1

C108/CSAT5/048

150811007 29 (0.547) Cm (29:33-95:105x0.500)

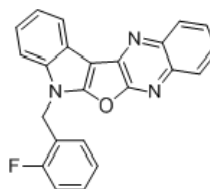

1: TOF MS ES+  
1.02e+005

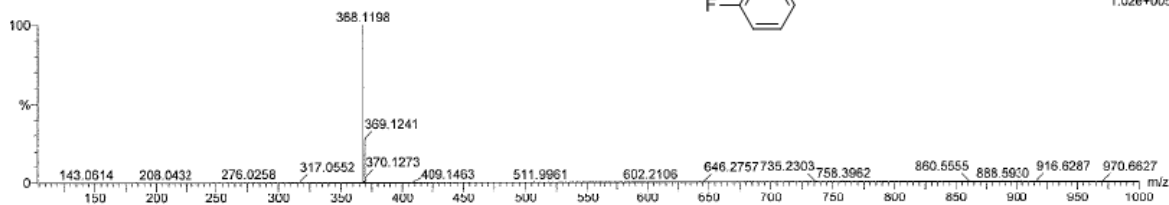

Minimum: -1.5  
Maximum: 80.0

| Mass     | Calc. Mass | mDa  | PPM  | DBR  | i-FIT | Formula        |
|----------|------------|------|------|------|-------|----------------|
| 368.1198 | 368.1199   | -0.1 | -0.3 | 17.5 | 7.2   | C23 H15 N3 O F |



TDC-117-C108-CBATS-040

AR.No: MB0615/2380

Analyst : NARSH B  
Solvent : dmso  
Date : Jun 26 2015  
NUCLEUS : H1  
FRQ (MHz): 400.22  
EXP : PROTON

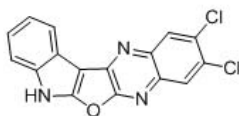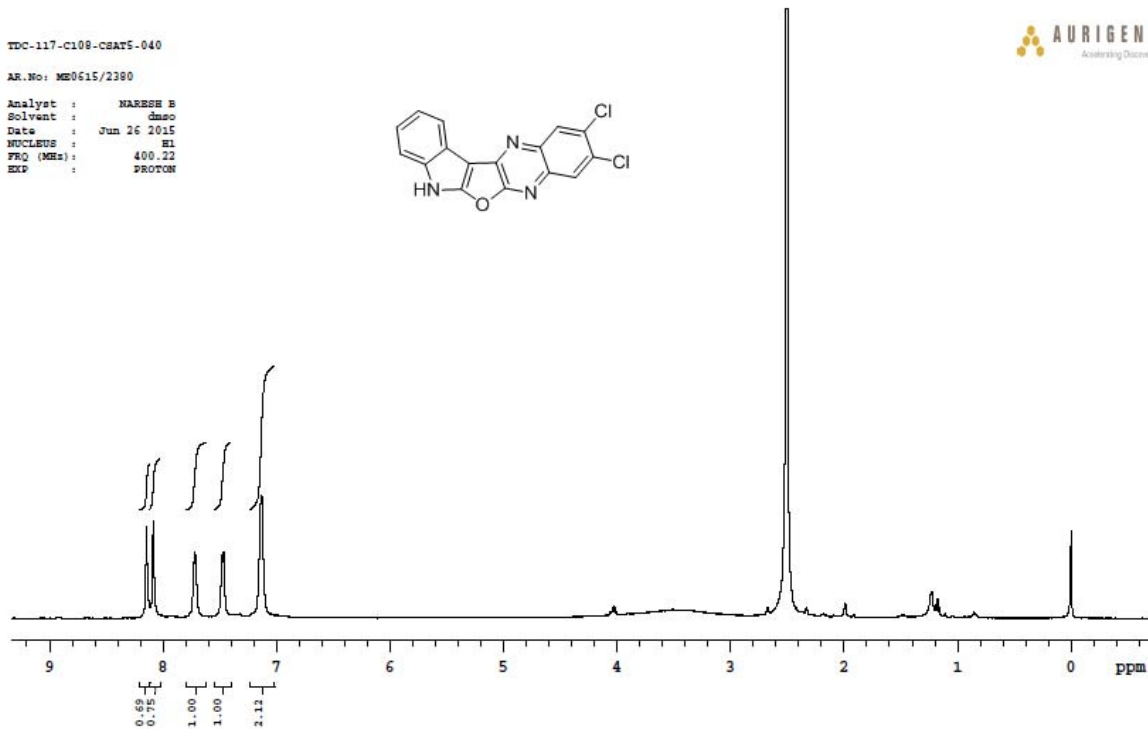

AURIGENE  
Accelerating Discovery

TDC-119 C108/CBATS/040

AR.No: MB0915/717

Analyst : Mallikarjun  
Solvent : dmso  
Date : Aug 9 2015  
NUCLEUS : C13  
FRQ (MHz): 100.65  
EXP : CARBON

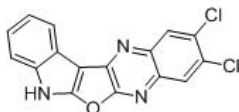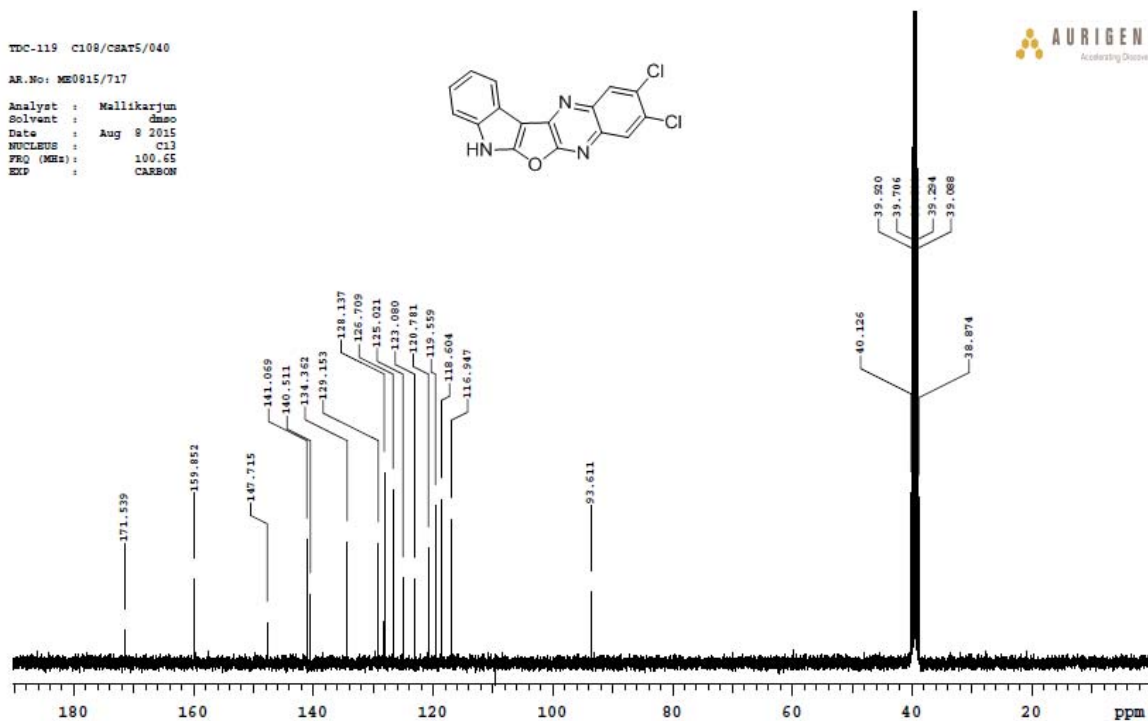

AURIGENE  
Accelerating Discovery

Elemental Composition Report

Single Mass Analysis

Tolerance = 6.5 PPM / DBE: min = -1.5, max = 80.0

Element prediction: Off

Number of isotope peaks used for i-FIT = 2

Monoisotopic Mass, Even Electron Ions

211 formula(e) evaluated with 1 results within limits (up to 20 closest results for each mass)

Elements Used:

C: 0-25 H: 0-27 N: 0-5 O: 0-4 Cl: 0-2

C108/CSAT5/040

150829001 21 (0.400) Cm (21:29-(1:6+52:69)x0.500)

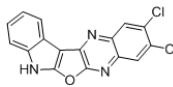

1: TOF MS ES+  
2.67e+004

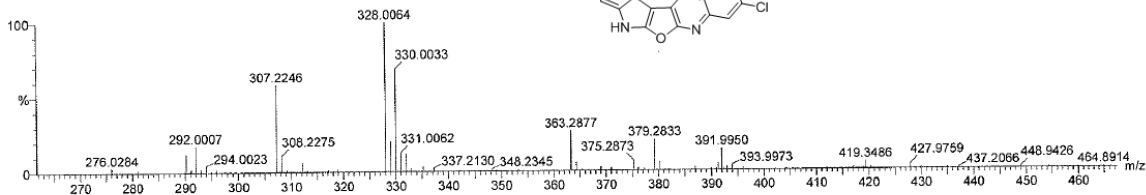

| Mass     | Calc. Mass | mDa | PPM | DBE  | i-FIT | Formula         |
|----------|------------|-----|-----|------|-------|-----------------|
| 328.0064 | 328.0044   | 2.0 | 6.1 | 13.5 | 13.0  | C16 H8 N3 O Cl2 |

TDC-117 C108/CSAT5/046

AR.No: ME0715/1985

Analyst : Mallikarjun  
Solvent : cdcl3  
Date : Jul 20 2015  
NUCLEUS : EI  
PFG (MHz) : 400.22  
EXP : PROTON

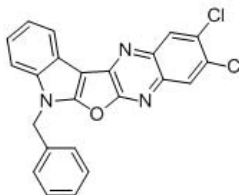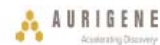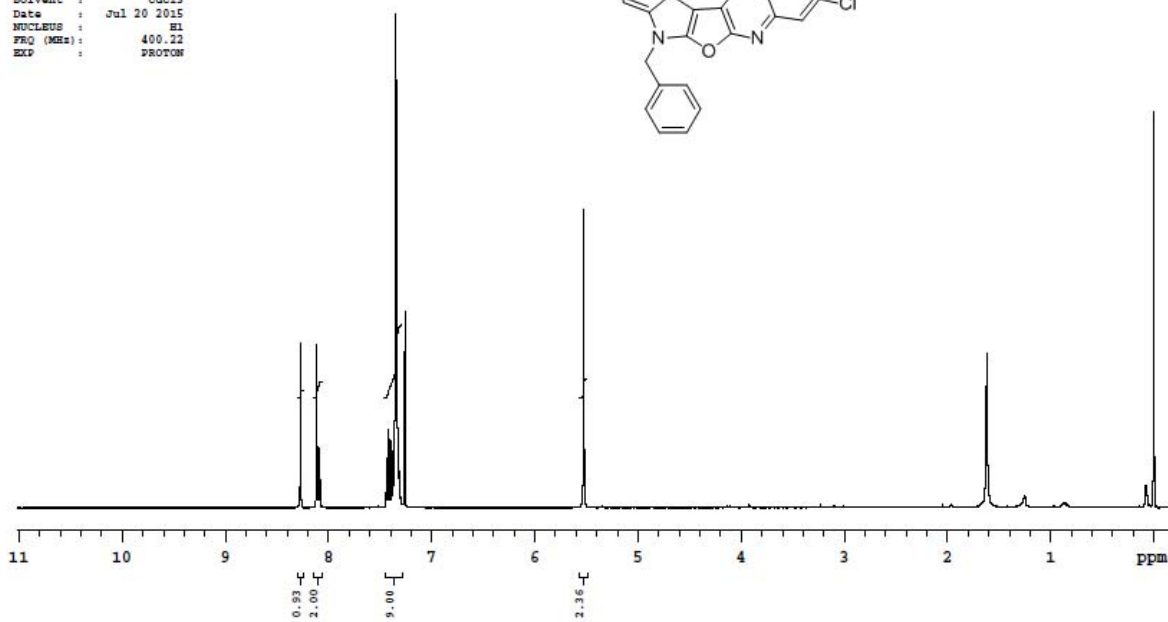

TDC-119 C108/CSAT5/046

AR.No: MB0715/2479

Analyst : Mallikarjun  
Solvent : cdcl3  
Date : Jul 26 2015  
NUCLEUS : C13  
FRQ (MHz): 100.65  
EXP : CARBON

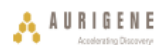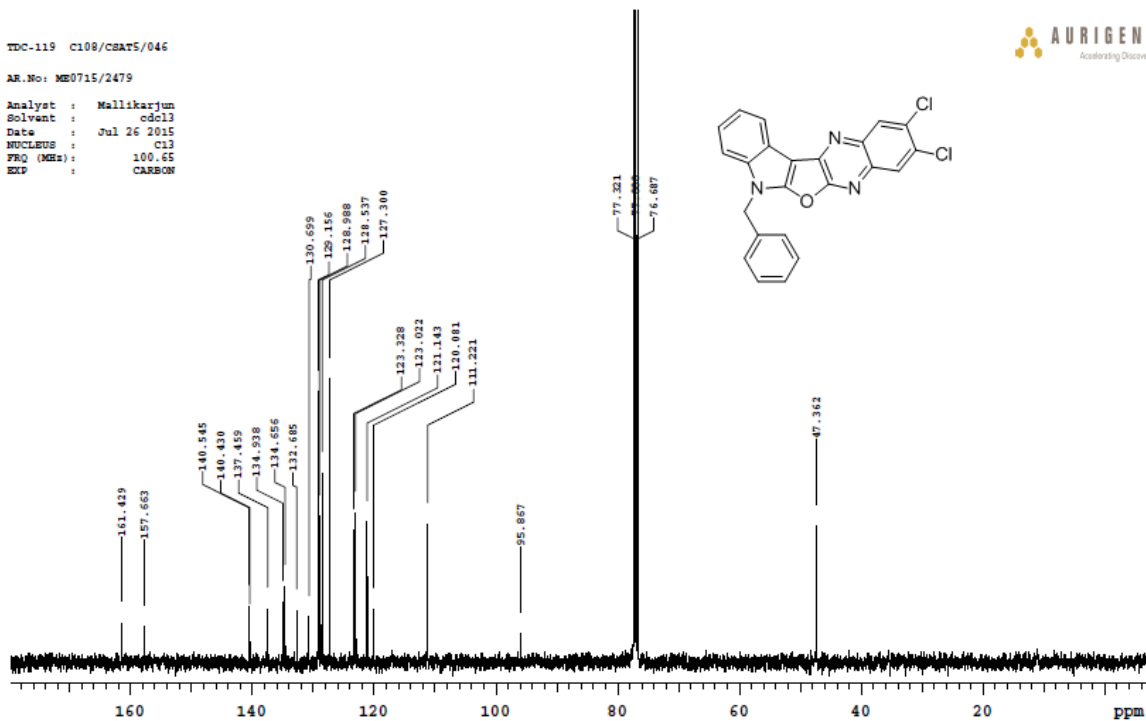

### Elemental Composition Report

Page 1

#### Single Mass Analysis

Tolerance = 7.0 PPM / DBE: min = -1.5, max = 80.0

Element prediction: Off

Number of isotope peaks used for i-FIT = 3

Monoisotopic Mass, Even Electron ions

56 formula(e) evaluated with 1 results within limits (up to 20 closest results for each mass)

Elements Used:

C: 0-25 H: 0-25 N: 0-5 O: 0-2 Cl: 0-2

C108/CSAT5/046

150720004 12 (0.319) Cm (11:12)

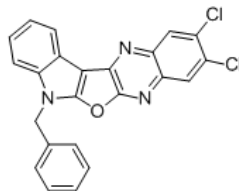

1: TOF MS ES+  
9.49e+003

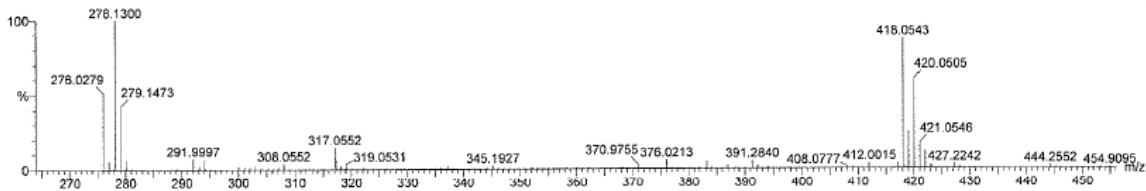

| Mass     | Calc. Mass | mDa | PPM | DBE  | i-FIT | Formula          |
|----------|------------|-----|-----|------|-------|------------------|
| 418.0543 | 418.0514   | 2.9 | 6.9 | 17.5 | 3.9   | C23 H14 N3 O Cl2 |

B-Singh

TDC-119 C108/CSAT5/047

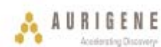

AR.No: ME0715/2206

Analyst : Mallikarjun  
Solvent : cdcl3  
Date : Jul 22 2015  
NUCLEUS : H1  
FREQ (MHz): 400.22  
EXP : PROTON

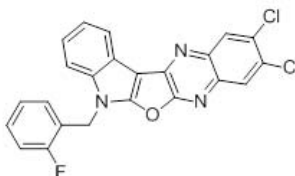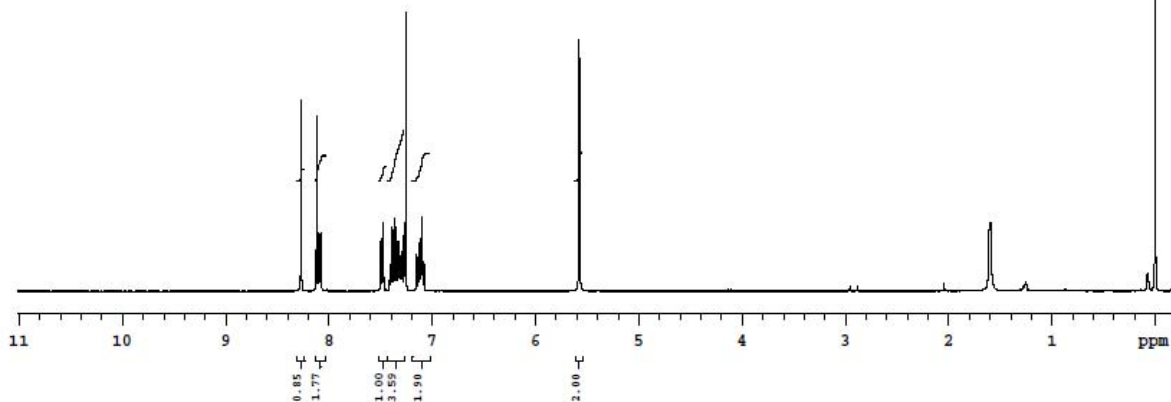

TDC-119 C108/CSAT5/047

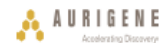

AR.No: ME0815/1452

Analyst : Mallikarjun  
Solvent : cdcl3  
Date : Aug 15 2015  
NUCLEUS : C13  
FREQ (MHz): 100.65  
EXP : CARBON

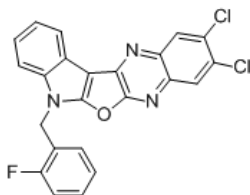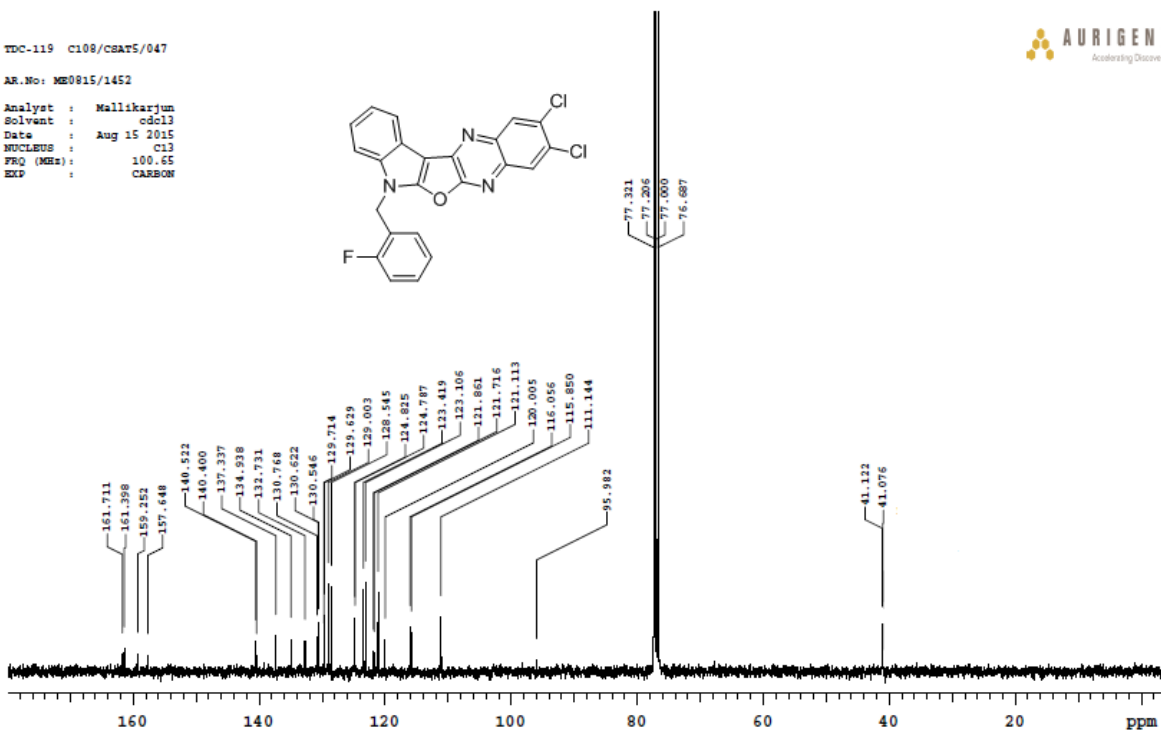



TDC-119 C108/CSAT5/049

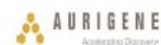

AR.No: ME0815/2826

Analyst : Mallikarjun  
Solvent : cdcl3  
Date : Aug 28 2015  
NUCLEUS : C13  
FREQ (MHz) : 100.65  
EXP : CARBON

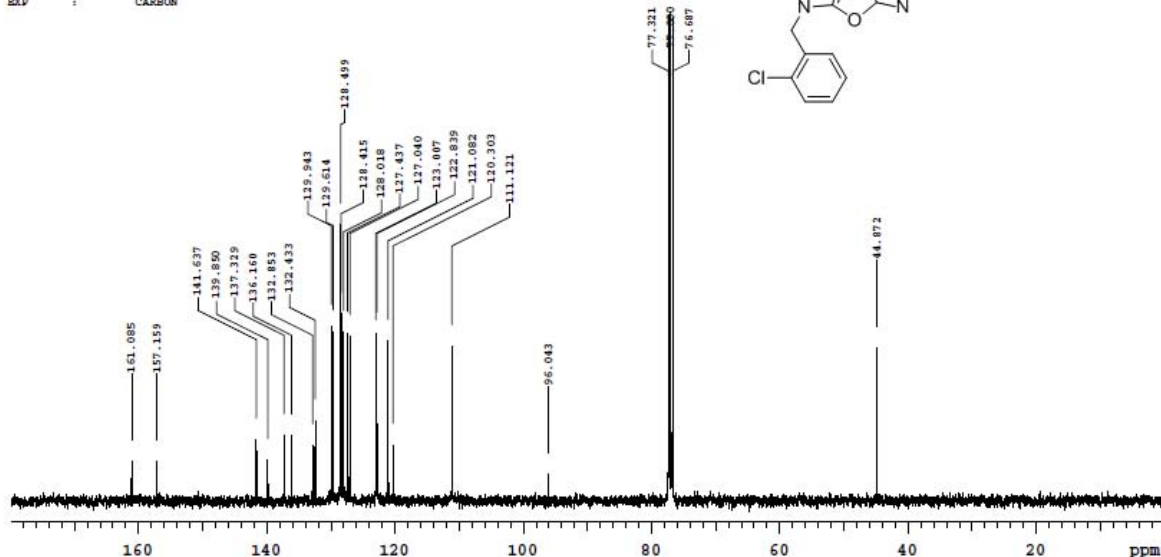

### Elemental Composition Report

Page 1

#### Single Mass Analysis

Tolerance = 5.0 PPM / DBE: min = -1.5, max = 80.0

Element prediction: Off

Number of isotope peaks used for i-FIT = 2

Monoisotopic Mass, Even Electron Ions

64 formula(e) evaluated with 1 results within limits (up to 20 closest results for each mass)

Elements Used:

C: 0-25 H: 0-16 N: 0-4 O: 0-2 Cl: 0-3

C108/CSAT5/049

150818012 27 (0.501) Cm (27:31)

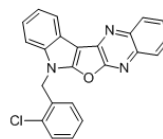

1: TOF MS ES+  
2.52e+005

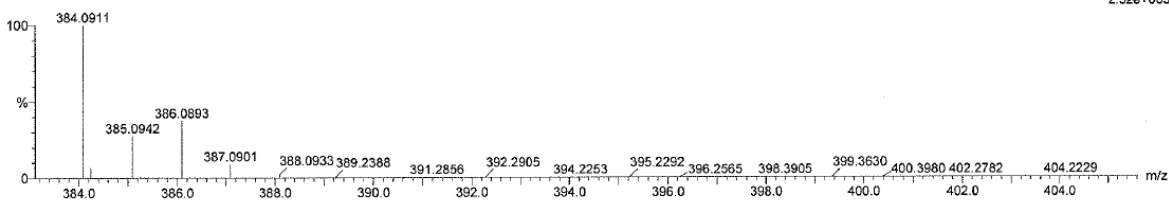

Minimum:

Maximum:

5.0 5.0 -1.5  
80.0

| Mass     | Calc. Mass | mDa | PPM | DBE  | i-FIT | Formula         |
|----------|------------|-----|-----|------|-------|-----------------|
| 384.0911 | 384.0904   | 0.7 | 1.8 | 17.5 | 19.0  | C23 H15 N3 O Cl |

TDC-119 C108/CSAT5/050

AR.No: MR0815/1636

Analyst : Mallikarjun  
Solvent : cdcl3  
Date : Aug 18 2015  
NUCLEUS : 1H  
FREQ (MHz): 400.22  
EXP : PROTON

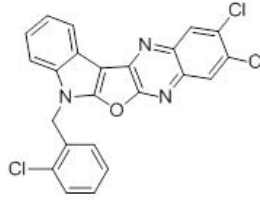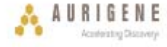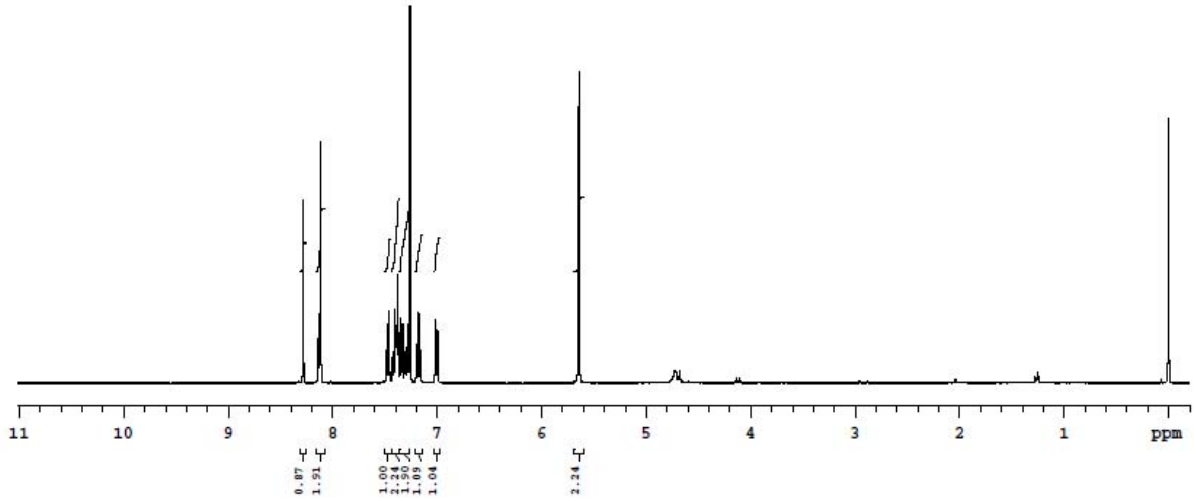

TDC-119 C108/CSAT5/050

AR.No: MR0815/2951

NUCLEUS : C13  
FREQ (MHz): 100.65  
EXP : s2pul

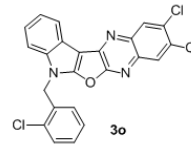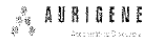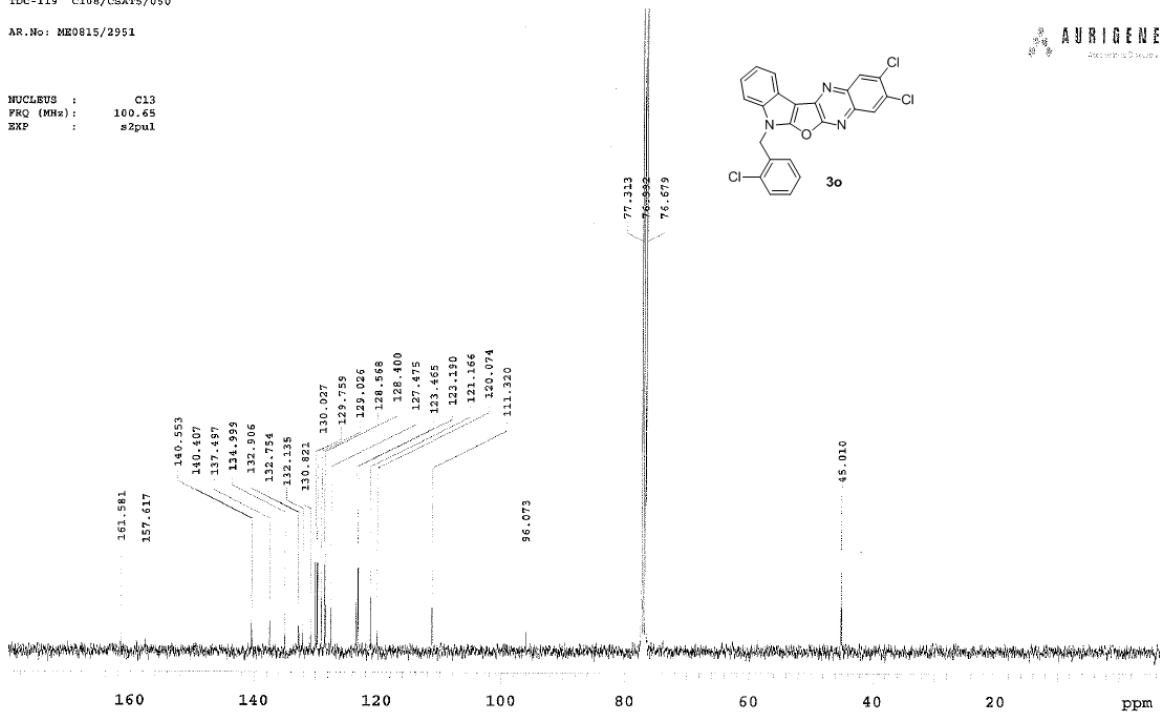

Elemental Composition Report

Single Mass Analysis

Tolerance = 6.5 PPM / DBE: min = -1.5, max = 80.0  
 Element prediction: Off  
 Number of isotope peaks used for i-FIT = 2

Monoisotopic Mass, Even Electron Ions  
 153 formula(e) evaluated with 1 results within limits (up to 20 closest results for each mass)  
 Elements Used:  
 C: 0-25 H: 0-27 N: 0-5 O: 0-4 Cl: 0-3  
 C108/CSATS050  
 150826003 20 (0.368) Cm (20:22)

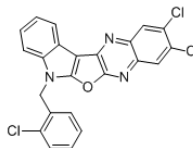

1: TOF MS ES+  
 4.19e+004

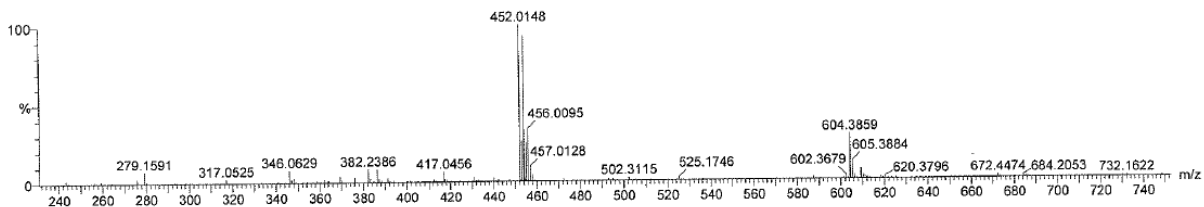

| Mass     | Calc. Mass | mDa | PPM | DBE  | i-FIT | Formula          |
|----------|------------|-----|-----|------|-------|------------------|
| 452.0148 | 452.0124   | 2.4 | 5.3 | 17.5 | 14.0  | C23 H13 N3 O Cl3 |

TDC-119 CA108-CSATS-065

A.R.No: ME0116/1130

Analyst : Mallikarjun  
 Solvent : dmsc  
 Date : Jan 18 2016  
 NUCLEUS : EI  
 FREQ (MHz): 400.22  
 EXP : PROTON

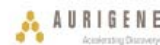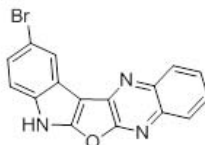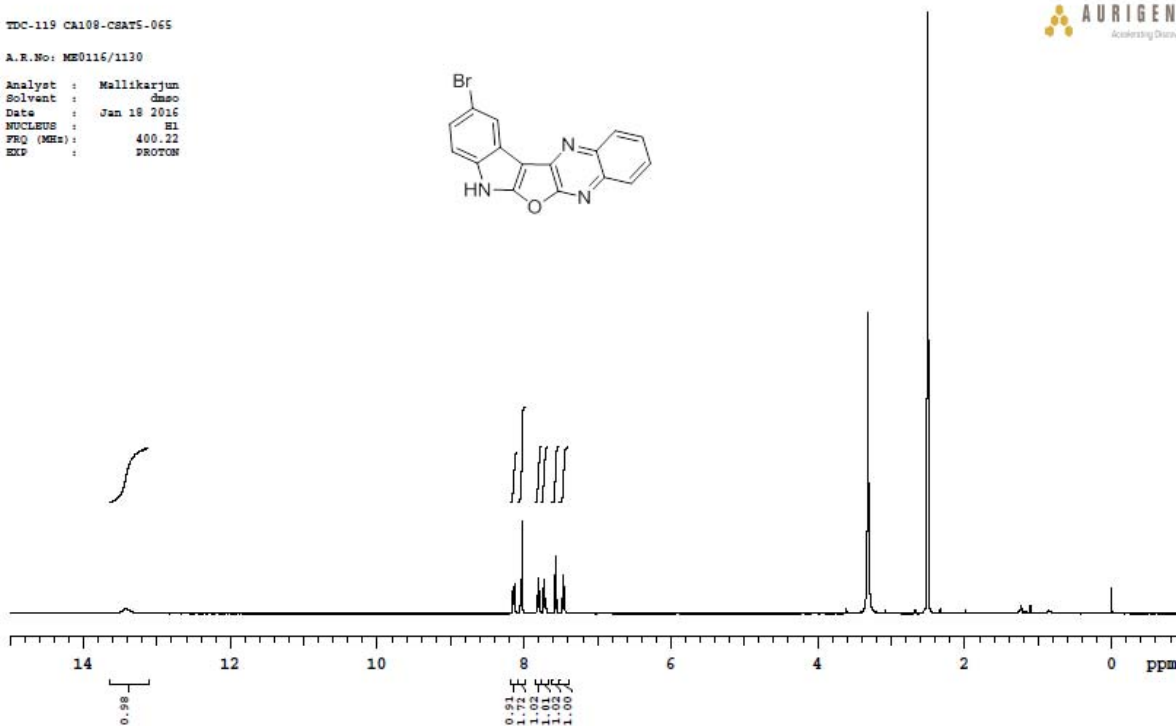



TDC-119 C108/CSATS/065

A.R.No: ME0116/1198

Analyst : Mallikarjun  
Solvent : dmso  
Date : Jan 19 2016  
NUCLEUS : C13  
FRQ (MHz): 100.65  
EXP : CARBON

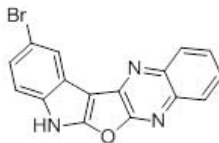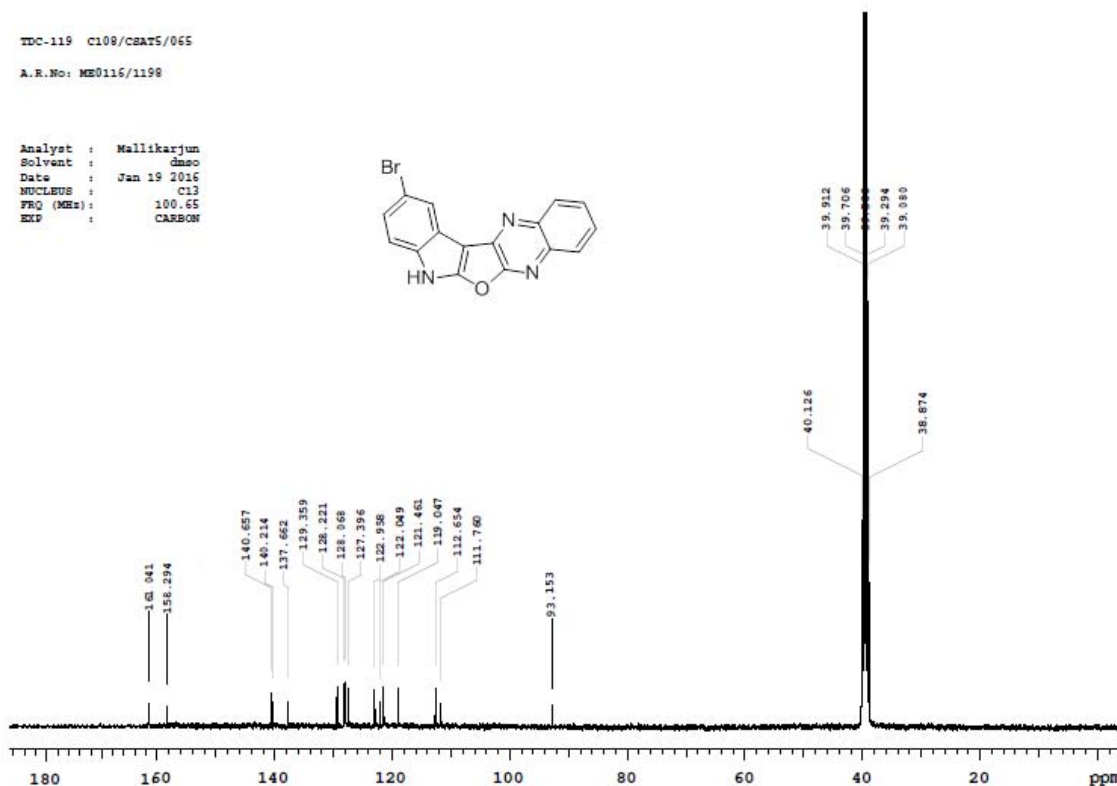

### Elemental Composition Report

Page 1

#### Single Mass Analysis

Tolerance = 5.0 PPM / DBE: min = -1.5, max = 100.0

Element prediction: Off

Number of isotope peaks used for i-FIT = 2

Monoisotopic Mass, Even Electron Ions

48 formula(e) evaluated with 1 results within limits (up to 10 closest results for each mass)

Elements Used:

C: 0-30 H: 0-22 N: 0-5 O: 0-1 Br: 0-1

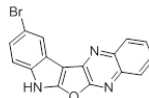

C108/CSATS/065  
160122001 18 (0.339) Cm (17.20)

1: TOF MS ES+  
1.41e+04

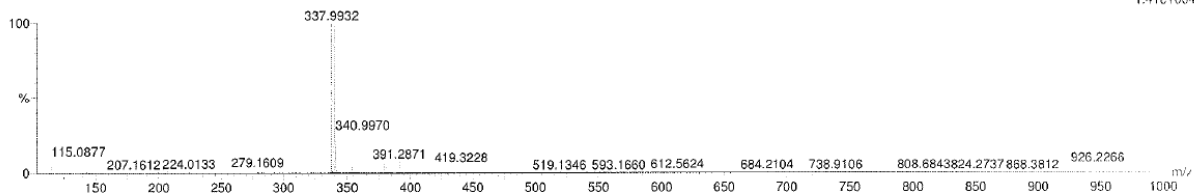

| Minimum: | Maximum: | Mass     | Calc. Mass | mDa | PPM | DBE  | i-FIT | Formula        |
|----------|----------|----------|------------|-----|-----|------|-------|----------------|
| -1.5     | 5.0      | 337.9932 | 337.9929   | 0.3 | 0.9 | 13.5 | 12.2  | C16 H9 N3 O Br |

TDC-119 C108-CSATS-066

A.R.No: MB0116/1122

Analyst : Mallikarjun  
Solvent : cdcl3  
Date : Jan 19 2016  
NUCLEUS : H1  
FREQ (MHz): 400.22  
EXP : PROTON

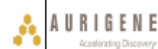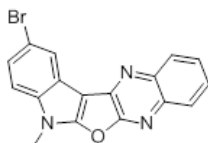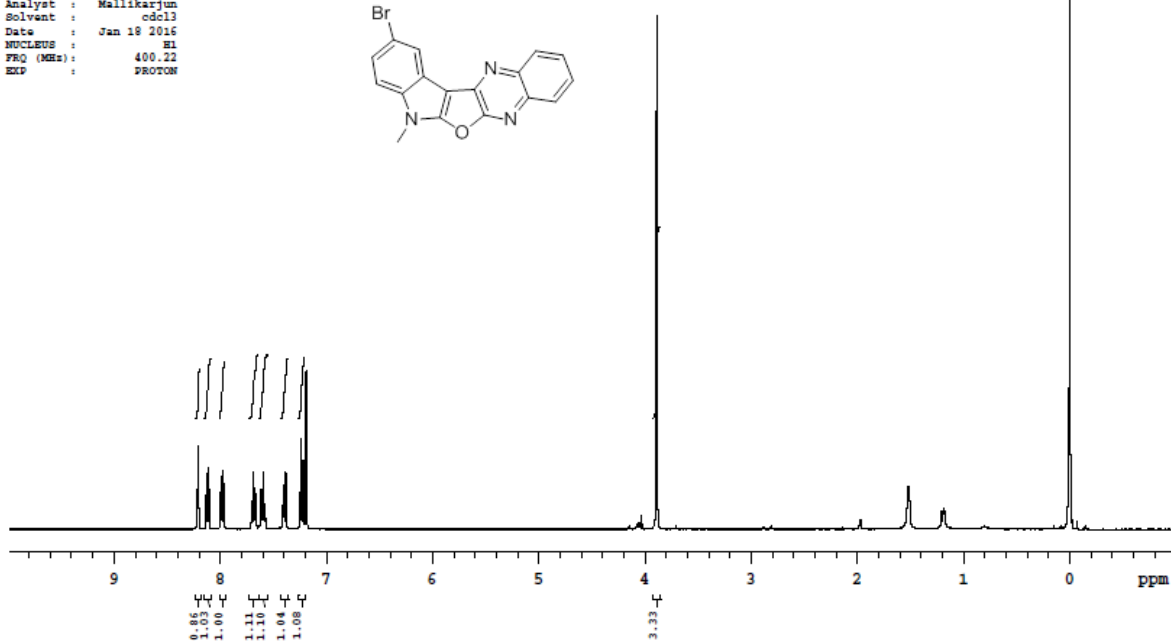

TDC-119 C108/CSATS/066

A.R.No: MB0116/1759

Analyst : Mallikarjun  
Solvent : cdcl3  
Date : Jan 23 2016  
NUCLEUS : C13  
FREQ (MHz): 100.65  
EXP : CARBON

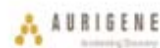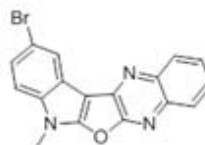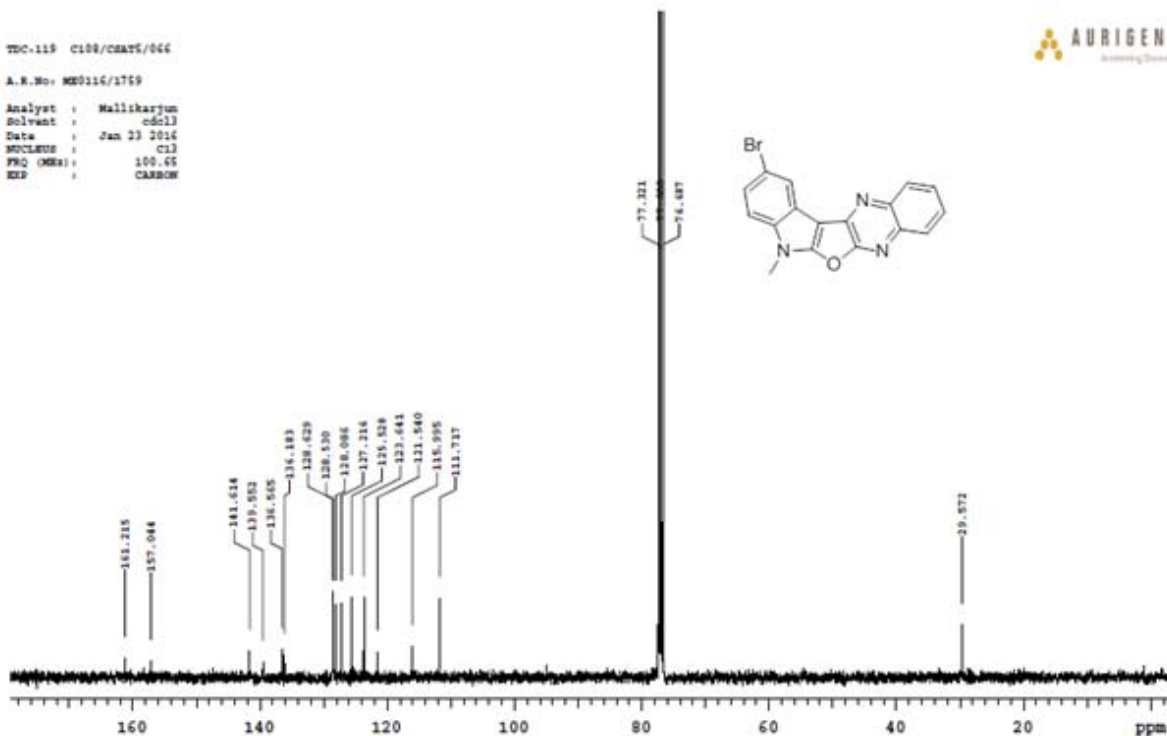

Single Mass Analysis

Tolerance = 6.0 PPM / DBE: min = -1.5, max = 100.0  
Element prediction: Off  
Number of isotope peaks used for i-FIT = 2

Monoisotopic Mass, Even Electron Ions  
48 formula(e) evaluated with 1 results within limits (up to 10 closest results for each mass)  
Elements Used:  
C: 0-30 H: 0-22 N: 0-5 O: 0-1 Br: 0-1

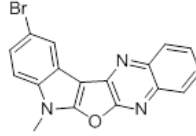

C108/CSAT51068  
160122002.22 (0.413) Cm (21:22)

1: TOF MS 1-S  
4.42e+003

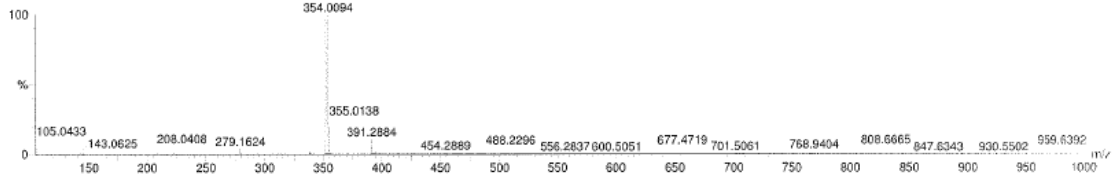

| Mass     | Calc. Mass | mDa | PPM | DBE  | i-FIT | Formula         |
|----------|------------|-----|-----|------|-------|-----------------|
| 352.0104 | 352.0085   | 1.9 | 5.4 | 13.5 | 1.3   | C17 H11 N3 O Br |

*BSM at 25/01/2016*

TDC-119 C108-CSAT5-067

A.R.No: MS0116/1133

Analyst : Mallikarjun  
Solvent : cdcl3  
Date : Jan 18 2016  
NUCLEUS : H1  
PRQ (MHz): 400.22  
EXP : PROTON

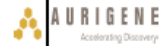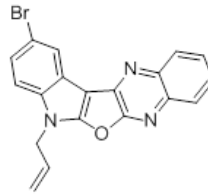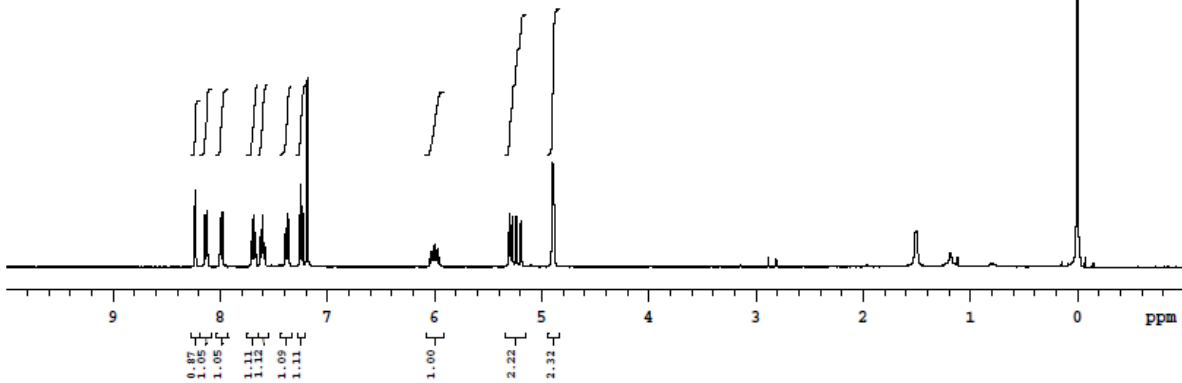

TDC-119 C108/CSATS/067

A.R.No: ME0116/1760

Analyst : Mallikarjun  
Solvent : cdcl3  
Date : Jan 24 2016  
NUCLEUS : C13  
FREQ (MHz) : 100.62  
EXP : CARBON

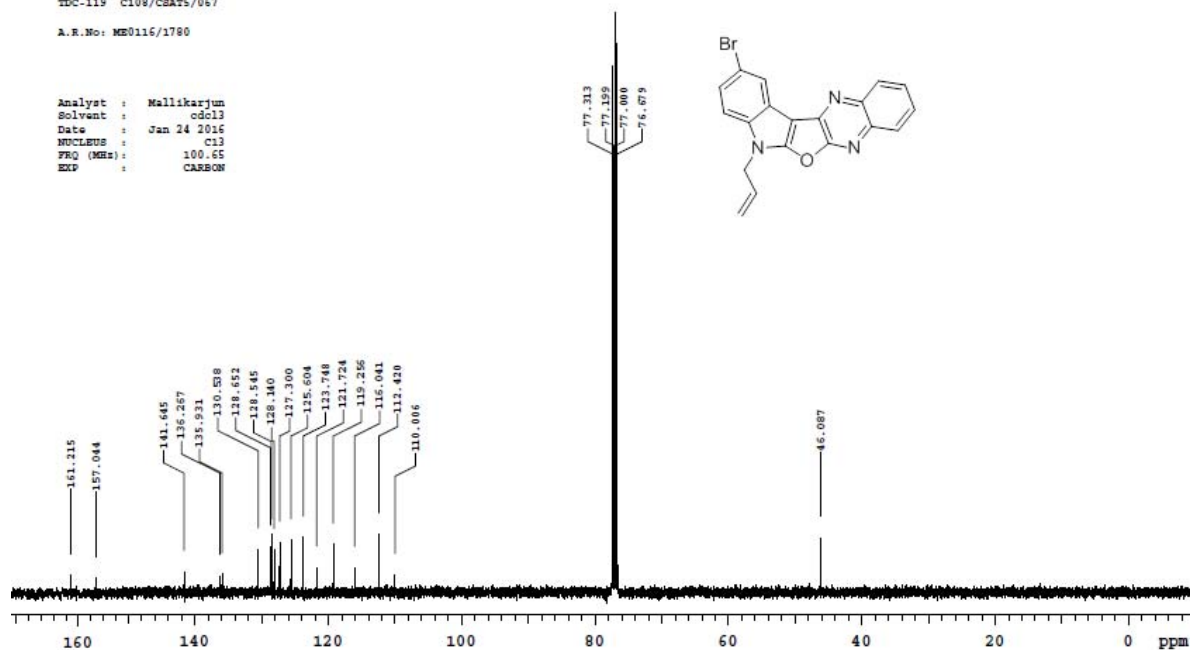

Elemental Composition report

Page 1

Single Mass Analysis

Tolerance = 5.0 PPM / DBE: min = -1.5, max = 100.0

Element prediction: Off

Number of isotope peaks used for i-FIT = 2

Monoisotopic Mass, Even Electron Ions

49 formula(e) evaluated with 1 results within limits (up to 50 closest results for each mass)

Elements Used:

C: 0-25 H: 0-20 N: 0-5 O: 0-2 Br: 0-1

C108/CSATS/067

160129001 33 (0.620) Cm (33:38)

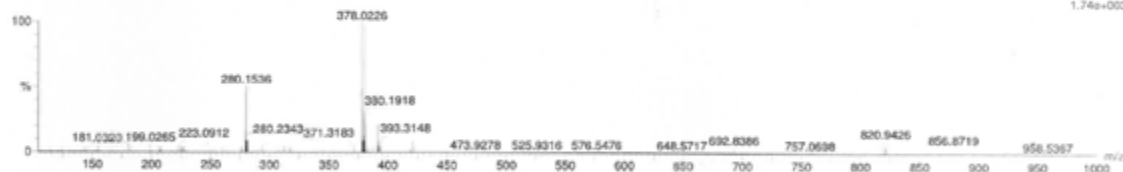

1: TOF MS ES+  
1.74e+003

Minimum:

Maximum: 5.0 5.0 -1.5 100.0

| Mass     | Calc. Mass | mDa  | PPM  | DBE  | i-FIT | Formula         |
|----------|------------|------|------|------|-------|-----------------|
| 378.0226 | 378.0242   | -1.6 | -4.2 | 14.5 | 11.8  | C19 H13 N3 O Br |

TDC-117 C108/CSAT5/043

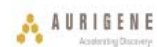

AR.No: ME0715/270

Analyt : Mallikarjun  
Solvent : dmsc  
Date : Jul 2 2015  
NUCLEUS : H1  
FRQ (MHz): 400.22  
EXP : PROTON

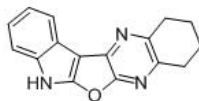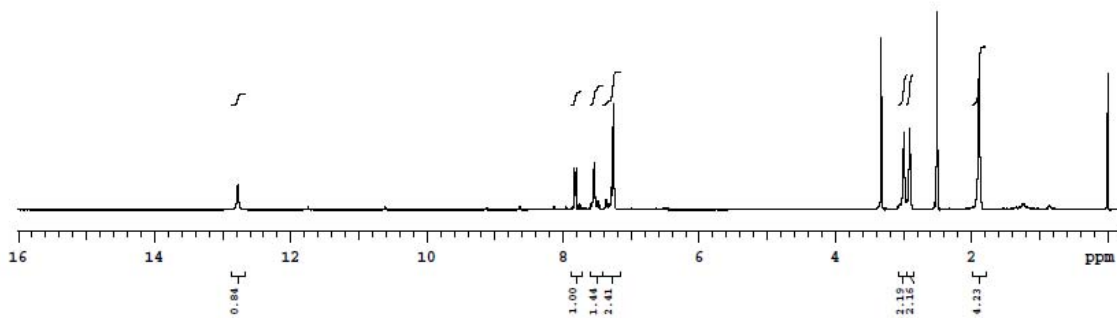

TDC-117 C108/CSAT5/043

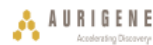

AR.No: ME0715/997

Analyt : Mallikarjun  
Solvent : dmsc  
Date : Jul 9 2015  
NUCLEUS : C13  
FRQ (MHz): 100.65  
EXP : CARBON

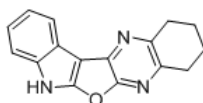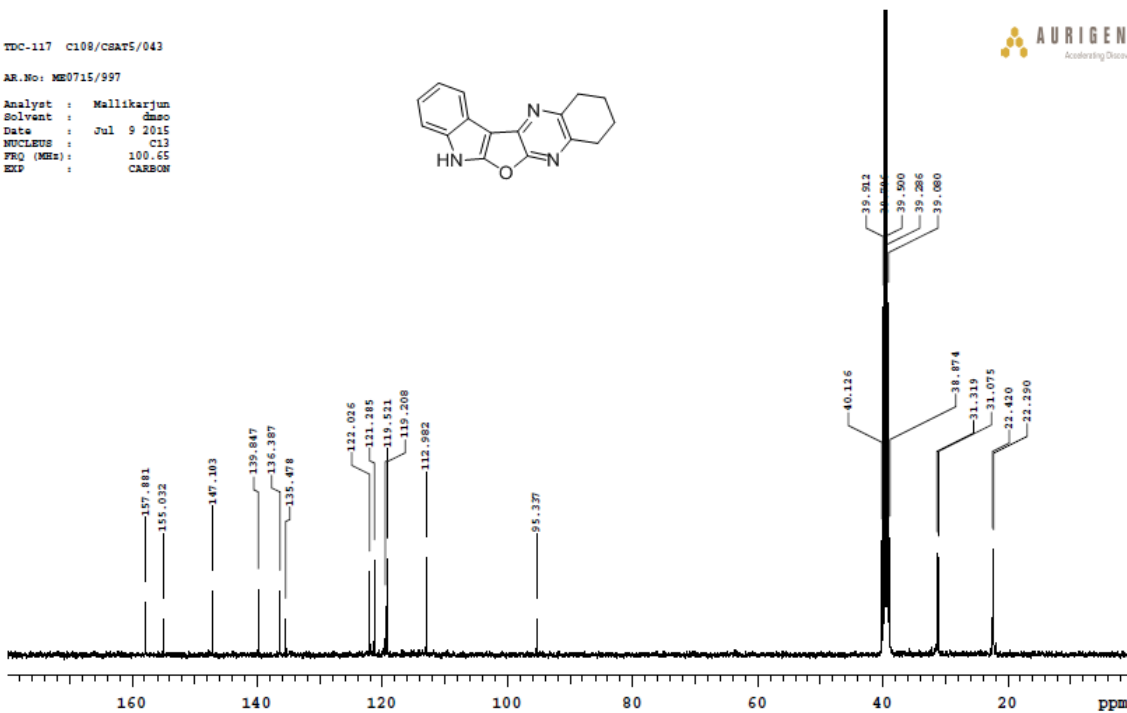

Elemental Composition Report

Single Mass Analysis

Tolerance = 20.0 PPM / DBE: min = -1.5, max = 80.0  
Element prediction: Off  
Number of isotope peaks used for i-FIT = 4

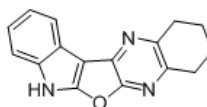

Monoisotopic Mass, Even Electron Ions  
40 formula(e) evaluated with 1 results within limits (up to 10 closest results for each mass)

Elements Used:

C: 0-22 H: 0-30 N: 0-4 O: 0-2

C108/CSAT5/043

150702011 18 (0.493) Cm (17:20)

1: TOF MS ES+  
4.24e+004

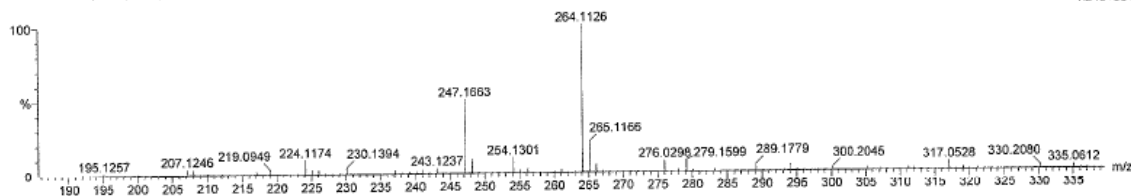

| Mass     | Calc. Mass | mDa  | PPM  | DBE  | i-FIT | Formula      |
|----------|------------|------|------|------|-------|--------------|
| 264.1126 | 264.1137   | -1.1 | -4.2 | 11.5 | 590.8 | C16 H14 N3 O |

B. Sanyal  
06/27/2015

TDC-117 C108/CSAT5/045

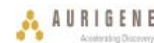

AR.No: MS0715/1986

Analyst : Mallikarjun  
Solvent : cdcl3  
Date : Jul 20 2015  
NUCLEUS : H1  
P1 (MHz) : 400.22  
EXP : PROTON

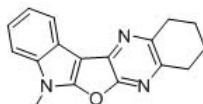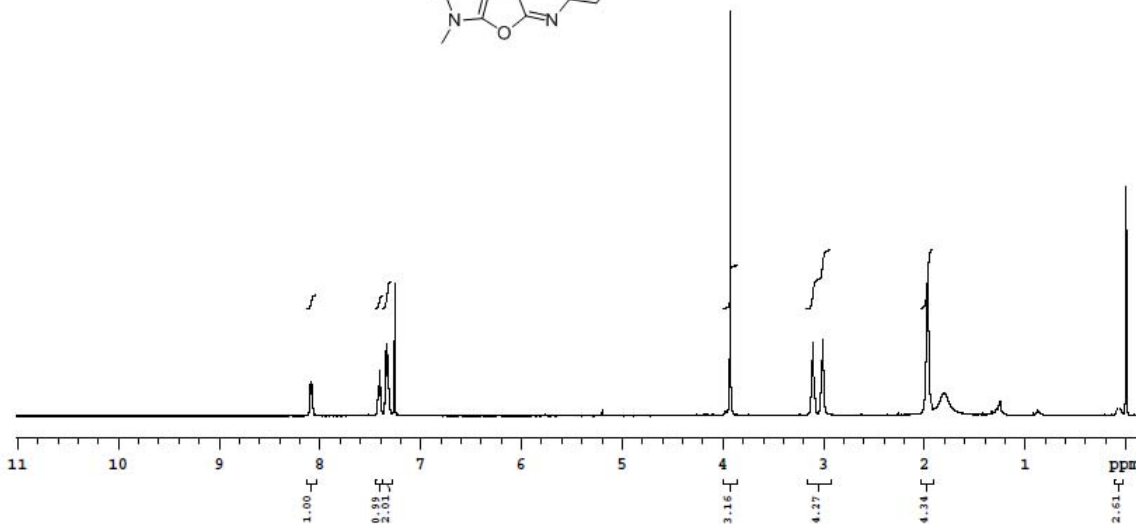

TDC-117 C108/CSAT5/045

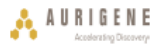

AR.No: MB0715/2476

Analyst : Mallikarjun  
Solvent : cdcl3  
Date : Jul 25 2015  
NUCLEUS : C13  
FREQ (MHz): 100.65  
EXP : CARBON

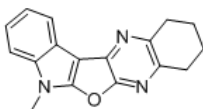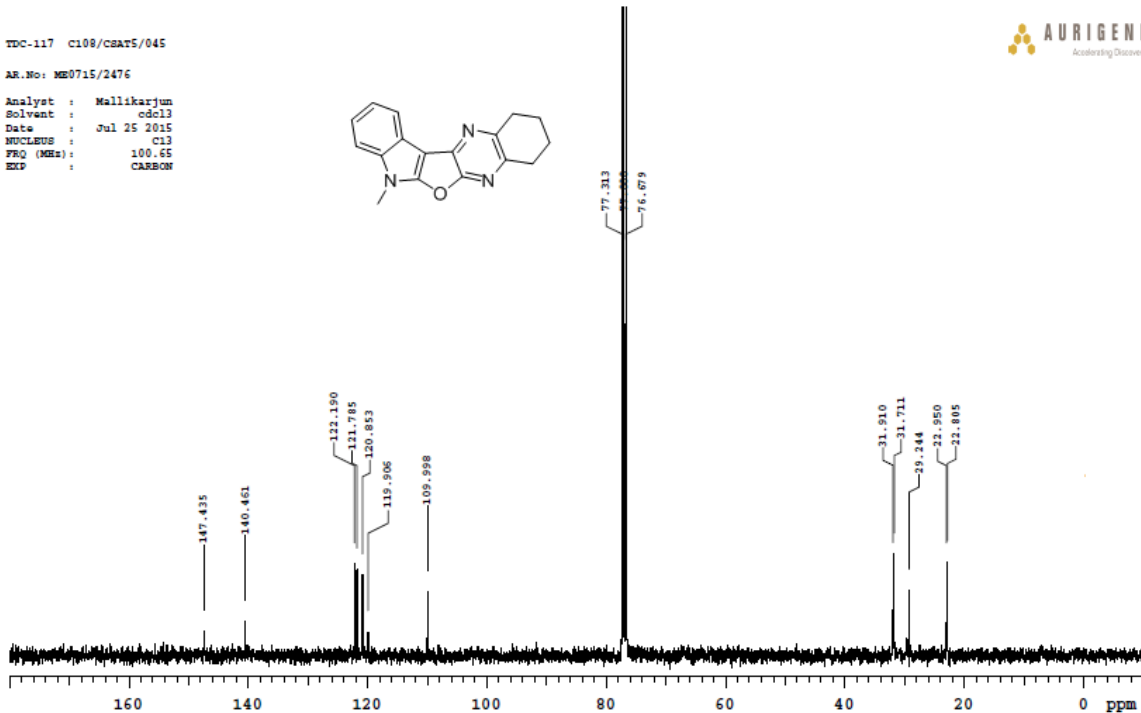

### Elemental Composition Report

Page 1

#### Single Mass Analysis

Tolerance = 10.0 PPM / DBE: min = -1.5, max = 80.0

Element prediction: Off

Number of isotope peaks used for i-FIT = 3

Monoisotopic Mass, Even Electron Ions

39 formula(e) evaluated with 1 results within limits (up to 20 closest results for each mass)

Elements Used:

C: 0-25 H: 0-25 N: 0-5 O: 0-2

C108/CSAT5/045

150720003 13 (0.365) Cm (13:19)

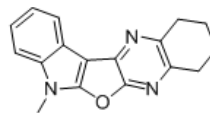

1: TOF MS ES-  
4.12e+005

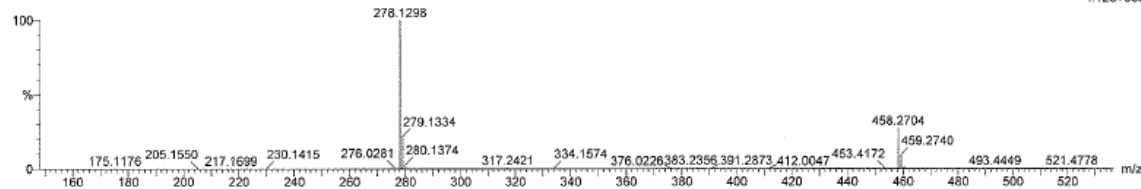

Minimum: -1.5  
Maximum: 5.0 10.0 80.0

| Mass     | Calc. Mass | mDa | PPM | DBE  | i-FIT | Formula      |
|----------|------------|-----|-----|------|-------|--------------|
| 278.1298 | 278.1293   | 0.5 | 1.8 | 11.5 | 562.6 | C17 H16 N3 O |

B. S. Mat  
21/07/2015

# Intermediate NMR

TDC-004 C108/CSAT2/016 in DMSO

NMR-400MHz  
AR.No: ME0714/2283  
Analyst: Haribabu  
Date:22nd July,2014

NUCLEUS : <sup>1</sup>H  
FRQ (MHz): 400.22  
EXP : s2pul

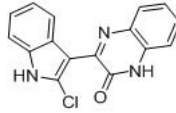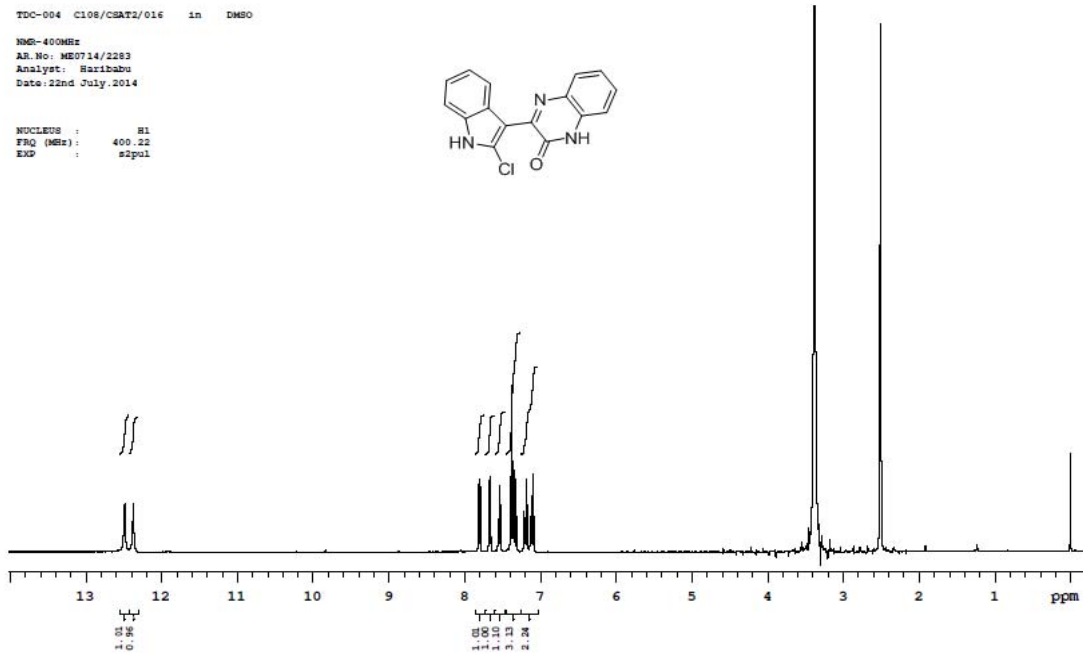

TDC-004 C108/CSAT3/016 in DMSO

13C NMR  
NMR-400MHz  
AR.No: ME0914/902  
Analyst: Haribabu  
Date:09th Sept,2014

NUCLEUS : <sup>13</sup>C  
FRQ (MHz): 100.65  
EXP : s2pul

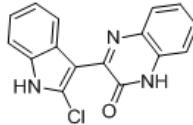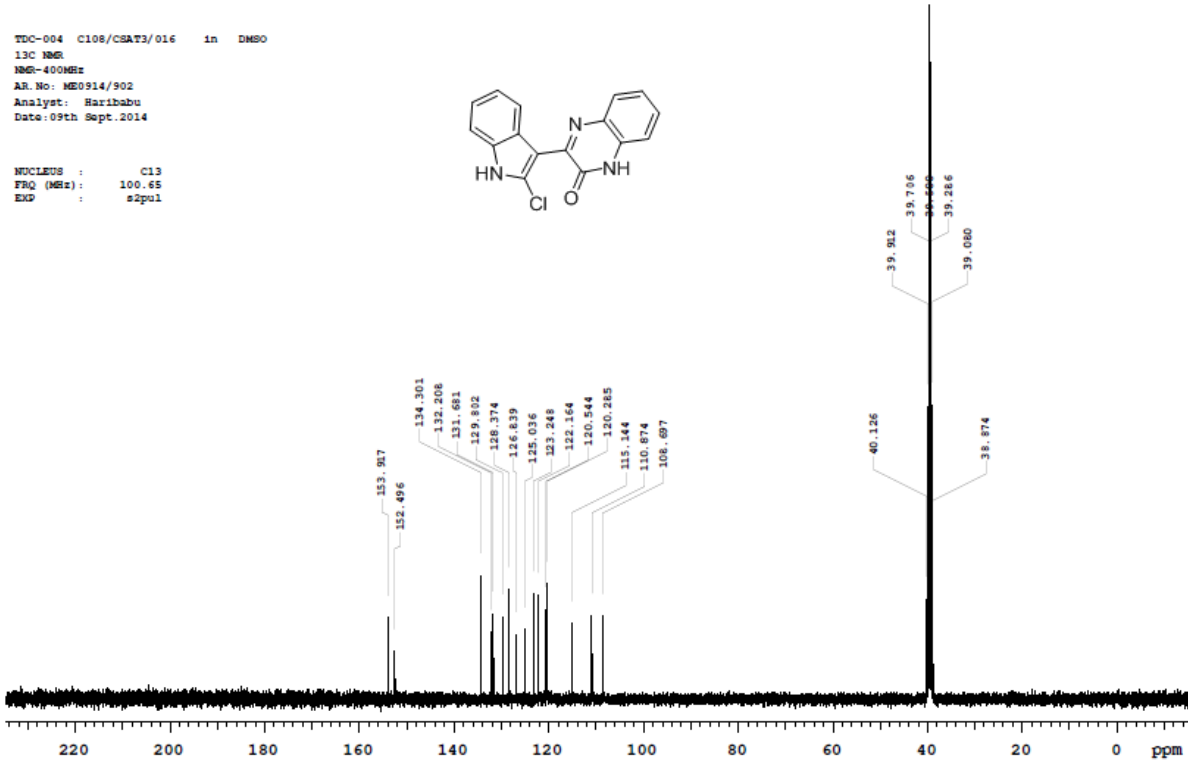



Elemental Composition Report

Single Mass Analysis

Tolerance = 11.0 PPM / DBE: min = -5.0, max = 30.0

Element prediction: Off

Number of isotope peaks used for i-FIT = 4

Monoisotopic Mass, Even Electron Ions

49 formula(e) evaluated with 1 results within limits (up to 10 best isotopic matches for each mass)

Elements Used:

C: 0-35 H: 0-35 N: 0-3 O: 0-1 Cl: 0-1

C108/CSAT2/016

140721005 58 (1.565) Cm (57.59)

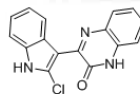

1: TOF MS ES+  
1.53e+003

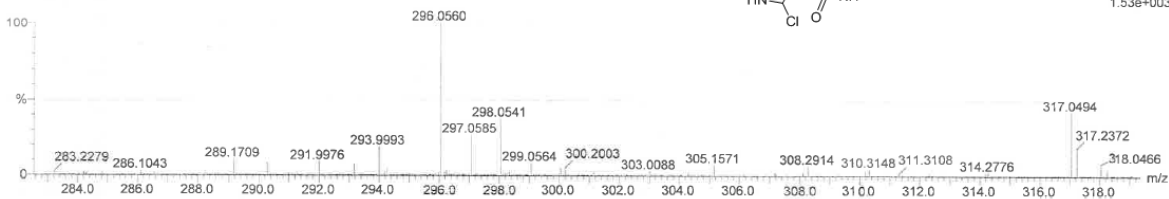

Minimum: -5.0  
Maximum: 5.0 11.0 80.0

| Mass     | Calc. Mass | mDa  | PPM   | DBE  | i-FIT | Formula         |
|----------|------------|------|-------|------|-------|-----------------|
| 296.0560 | 296.0591   | -3.1 | -10.5 | 12.5 | 18.2  | C16 H11 N3 O Cl |
